# Supplementary material
Source: publisher figshare collection journal article supplement (https://tandf.figshare.com/ndownloader/files/30926974)

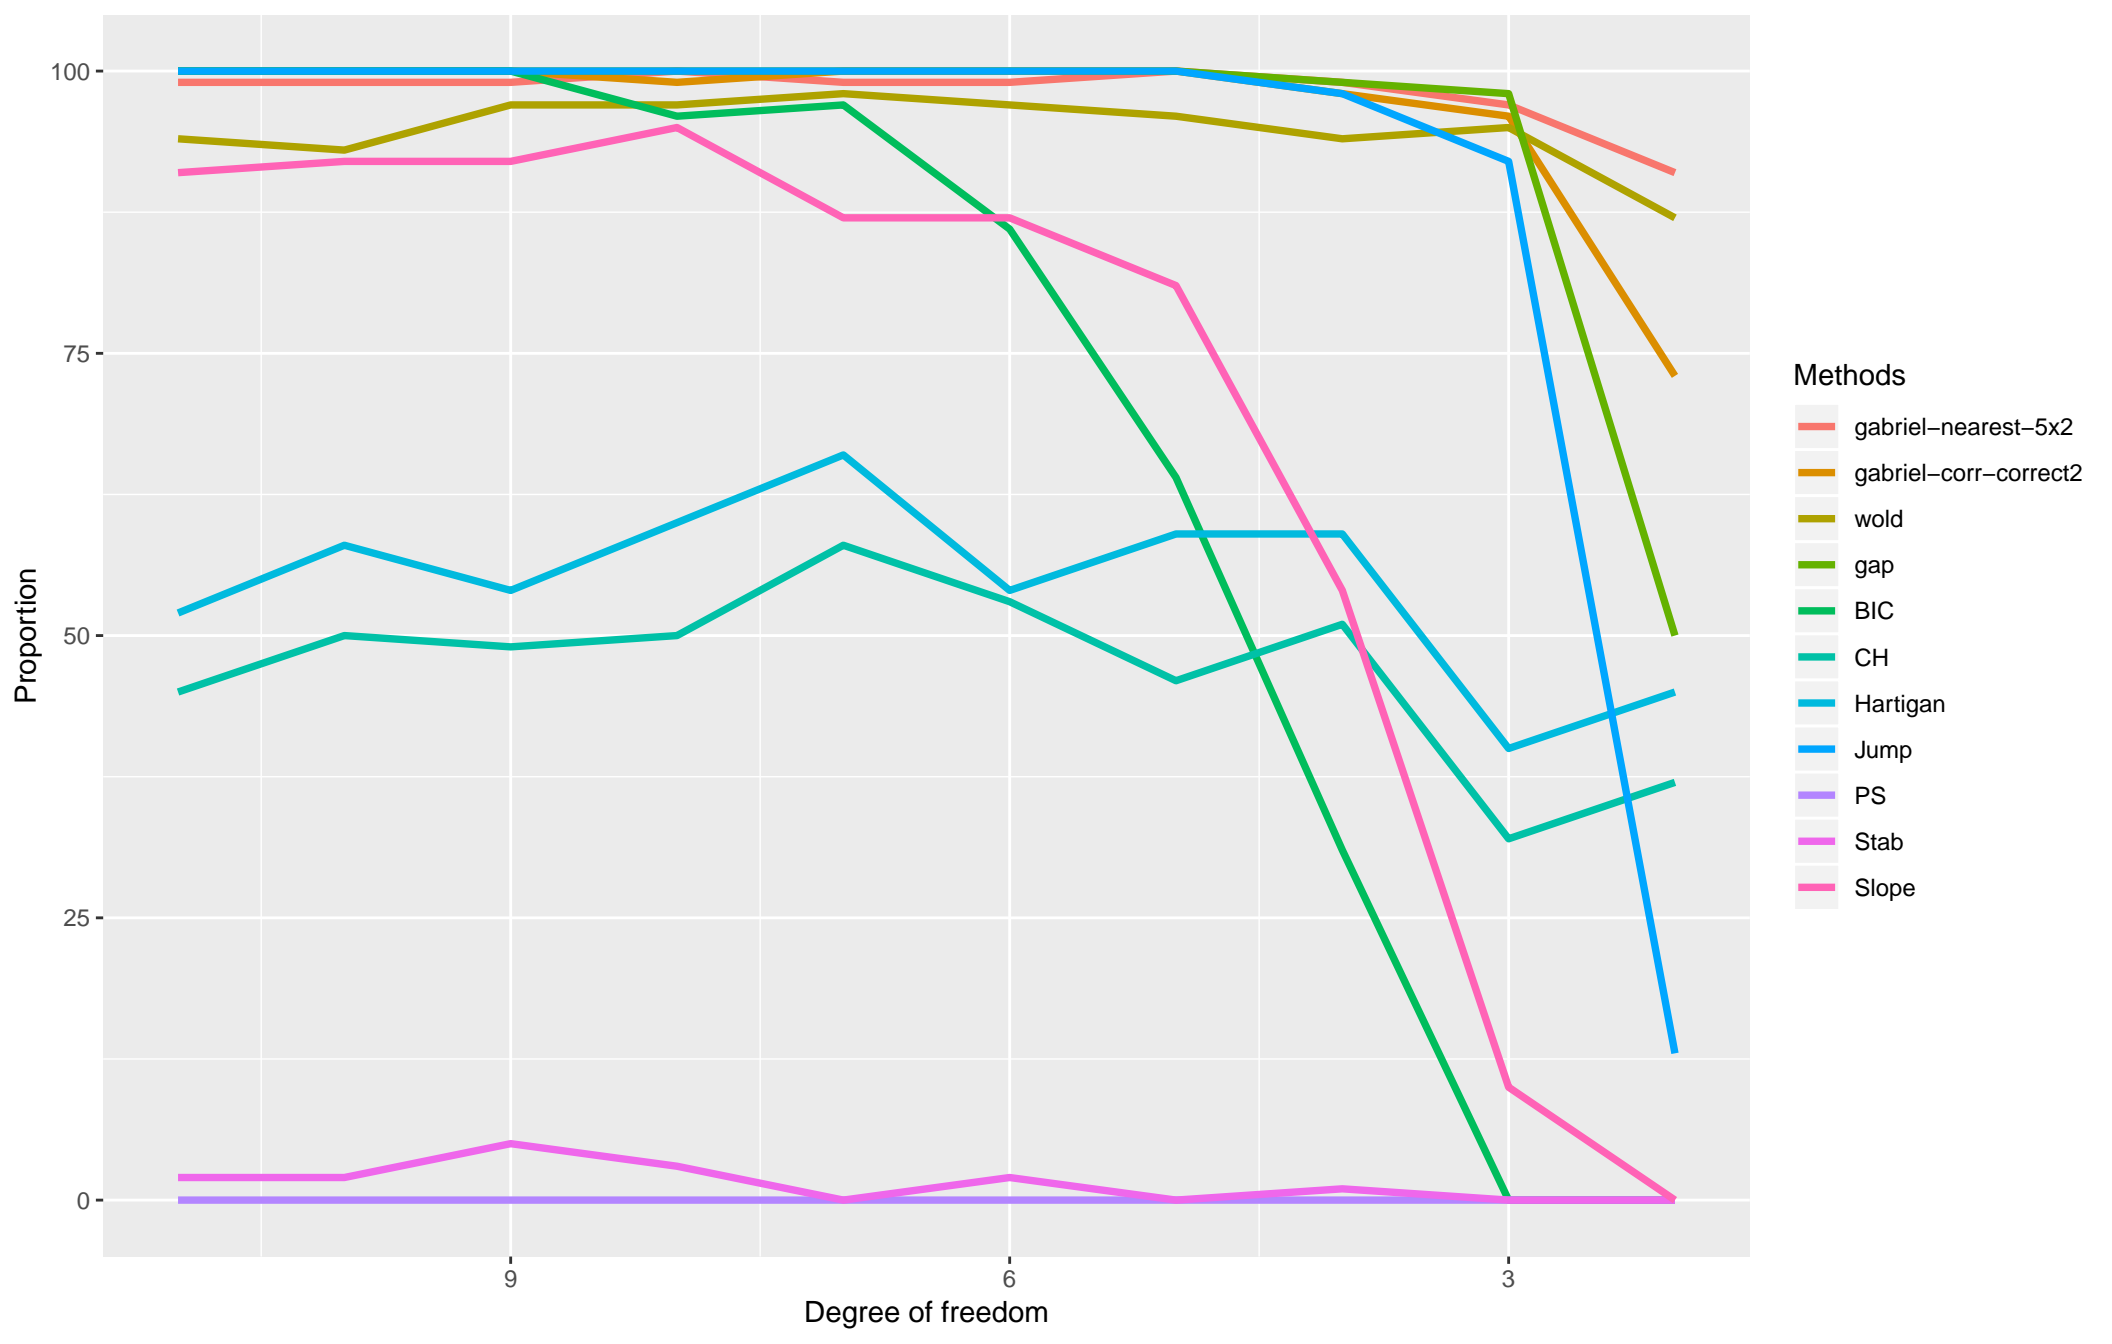

Supplement: Supplementary file 1 [file 30926974]

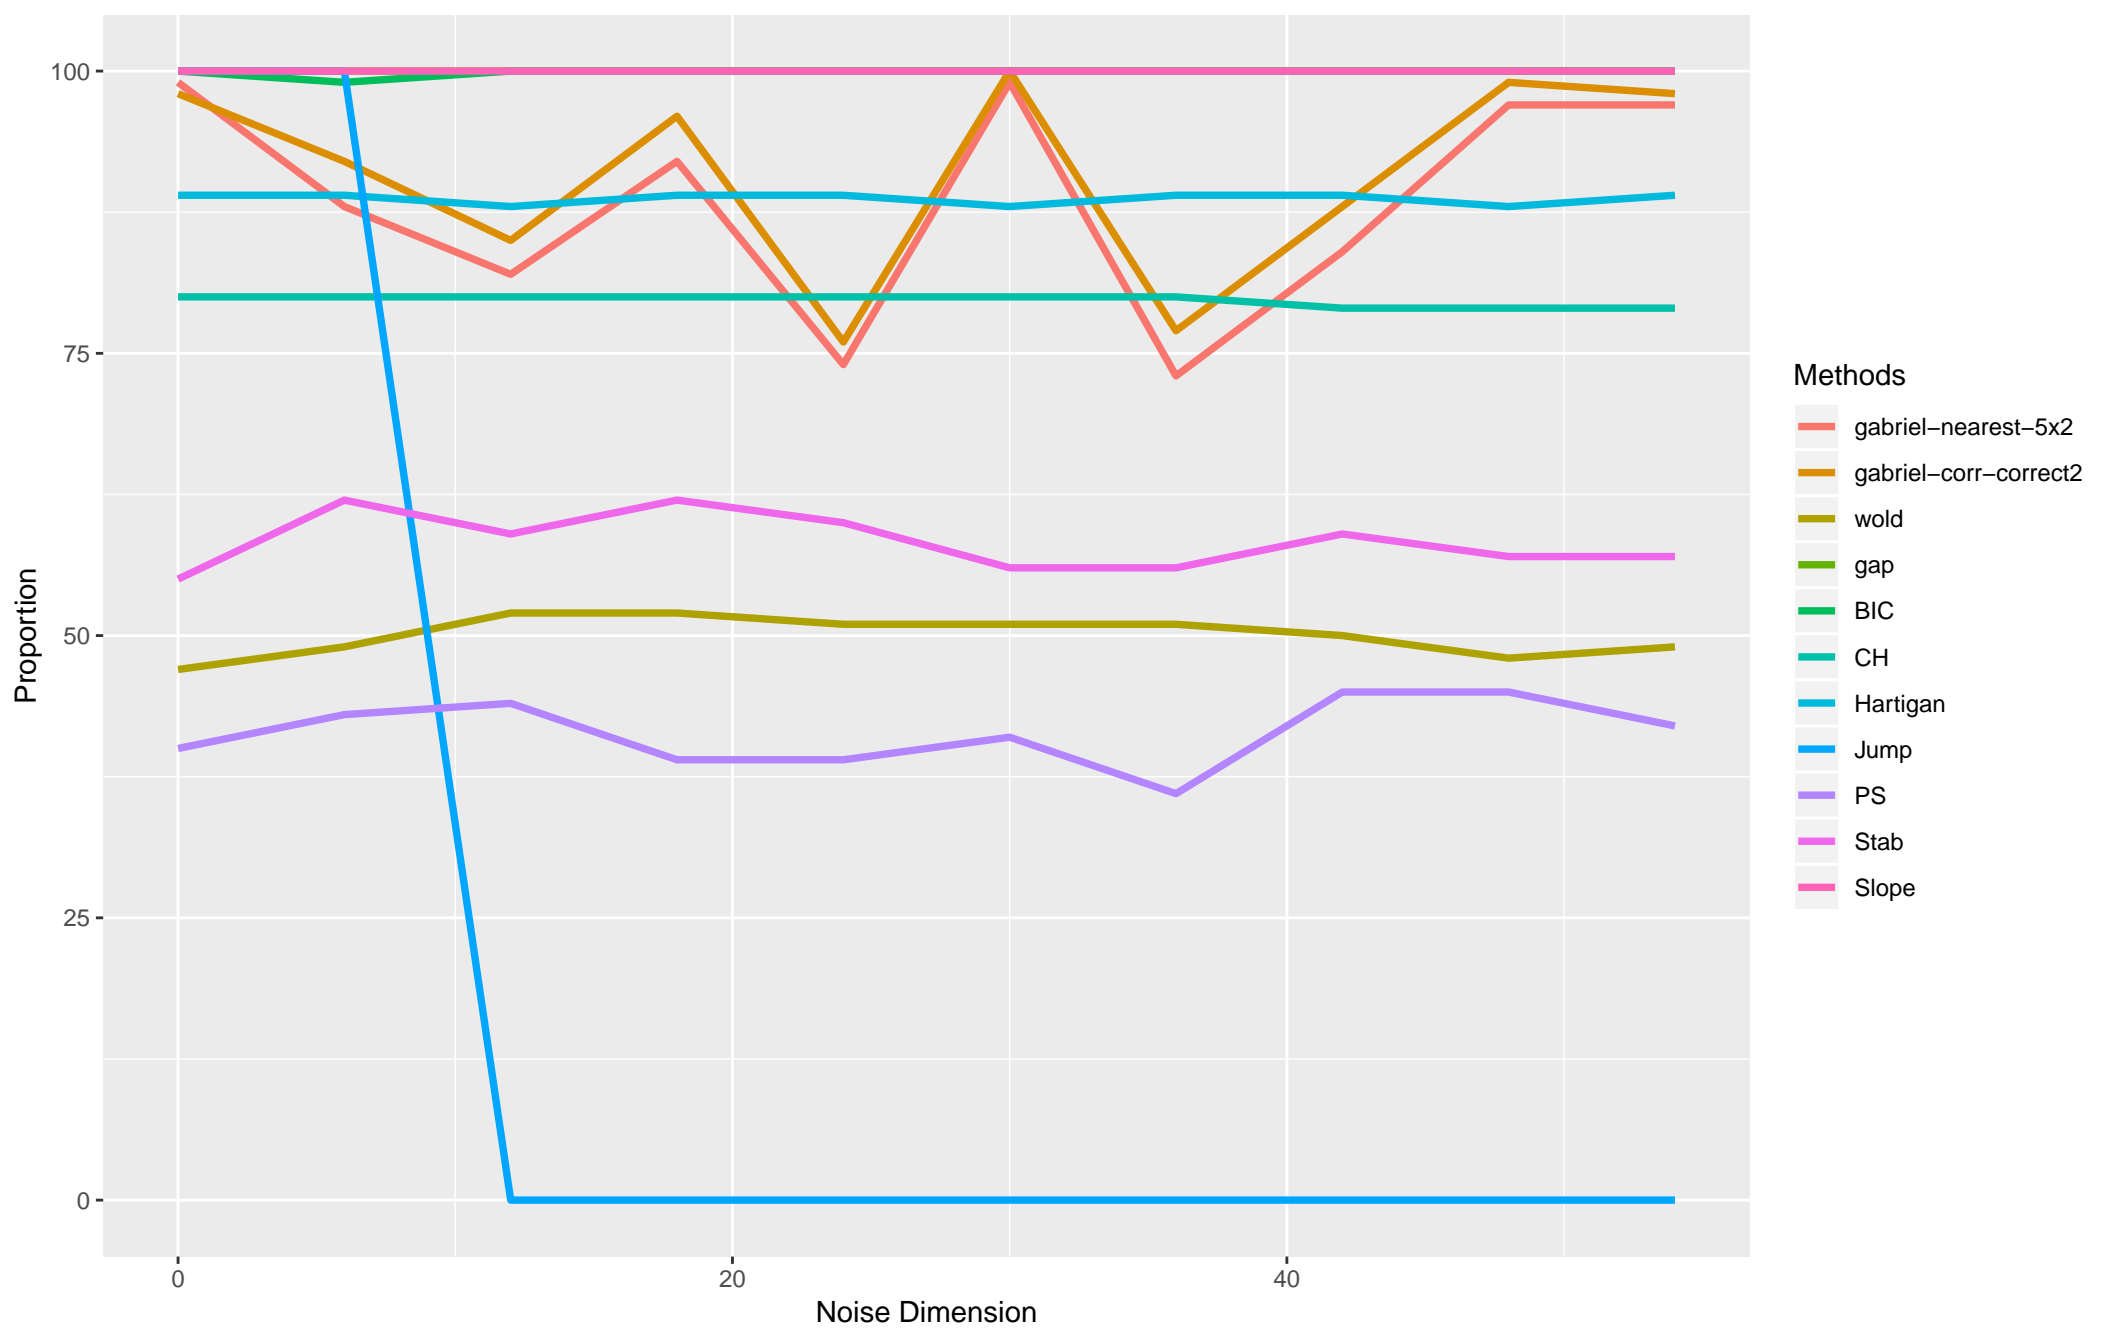

Supplement: Supplementary file 2 [file 30926974]

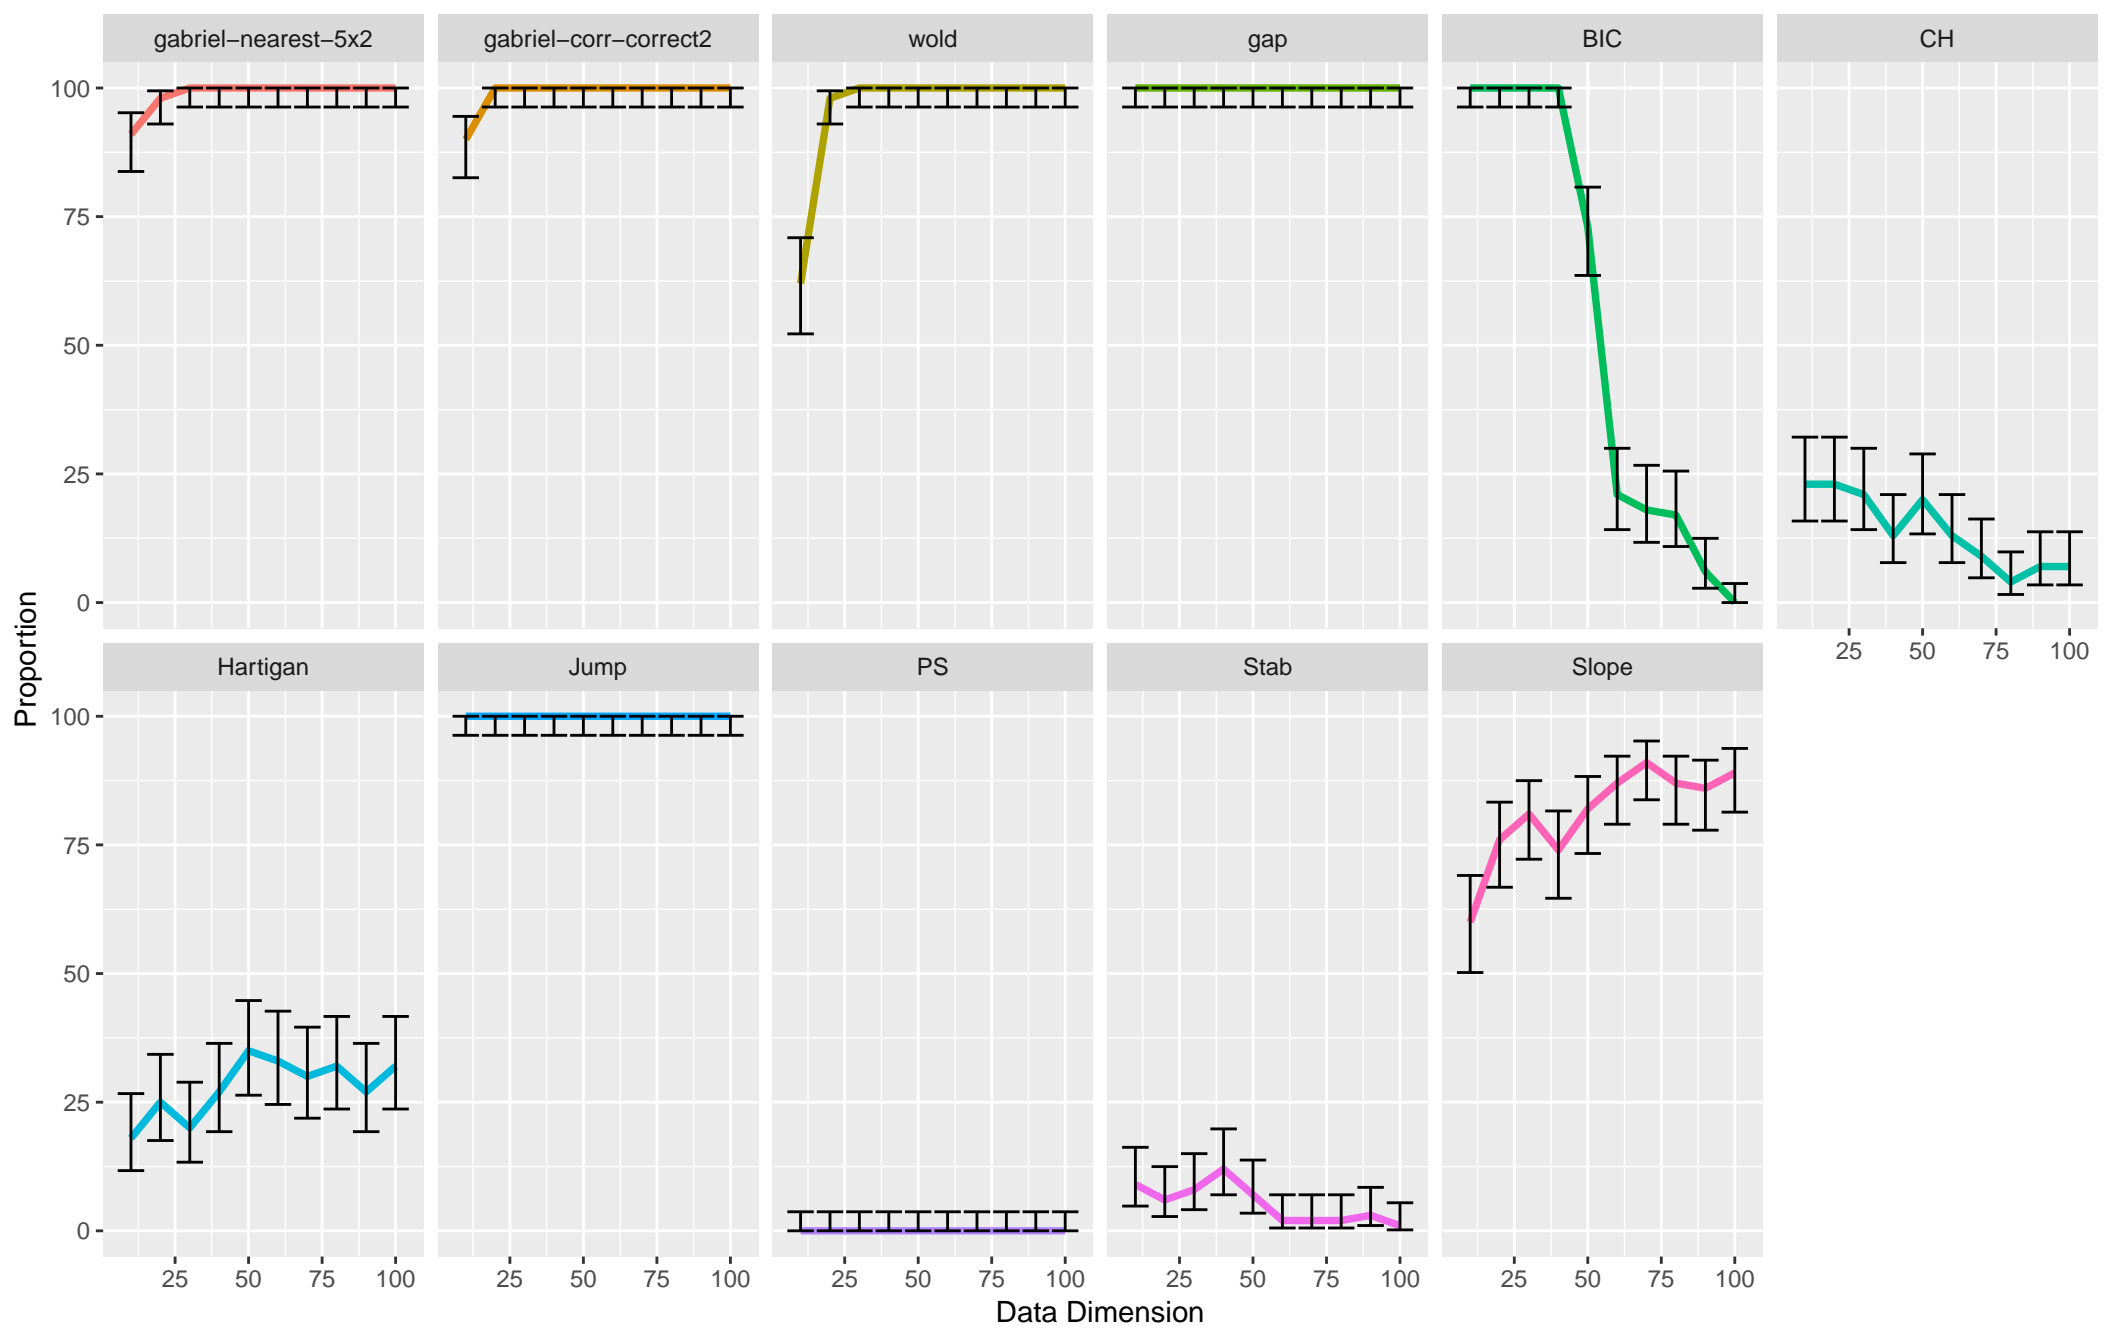

Supplement: Supplementary file 3 [file 30926974]

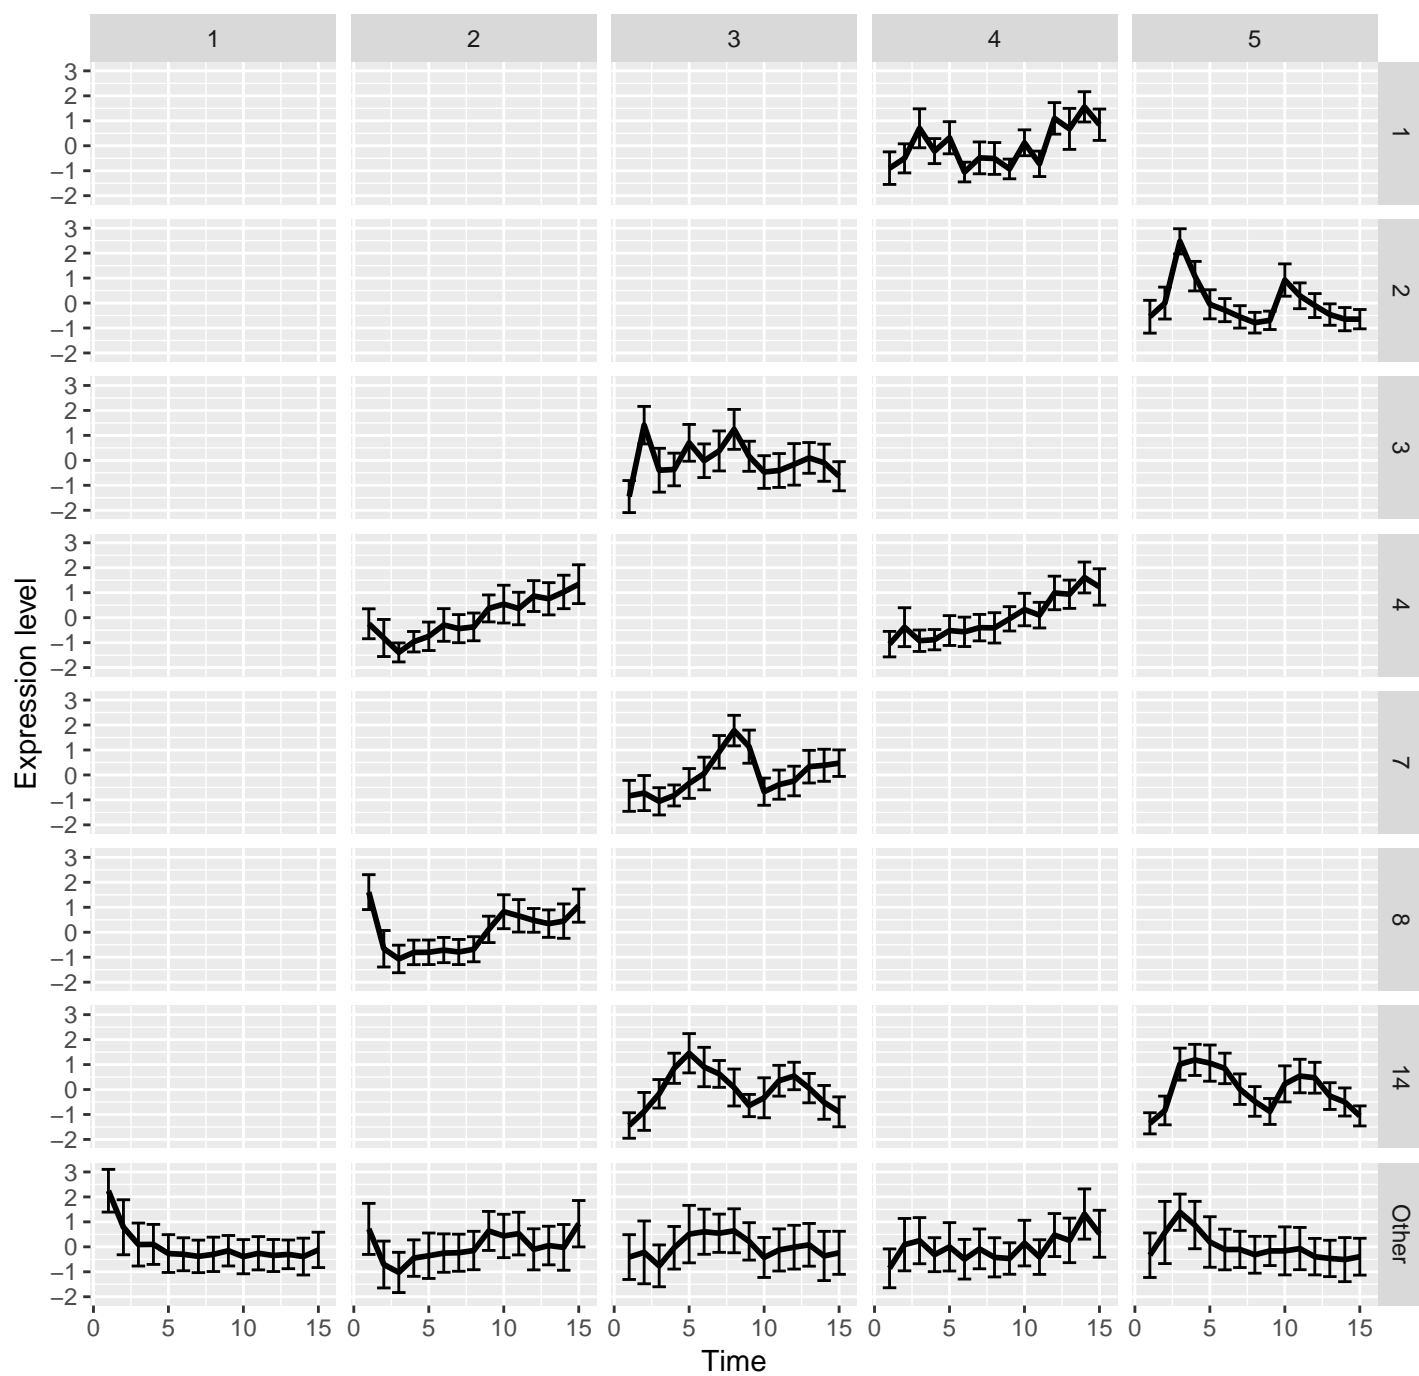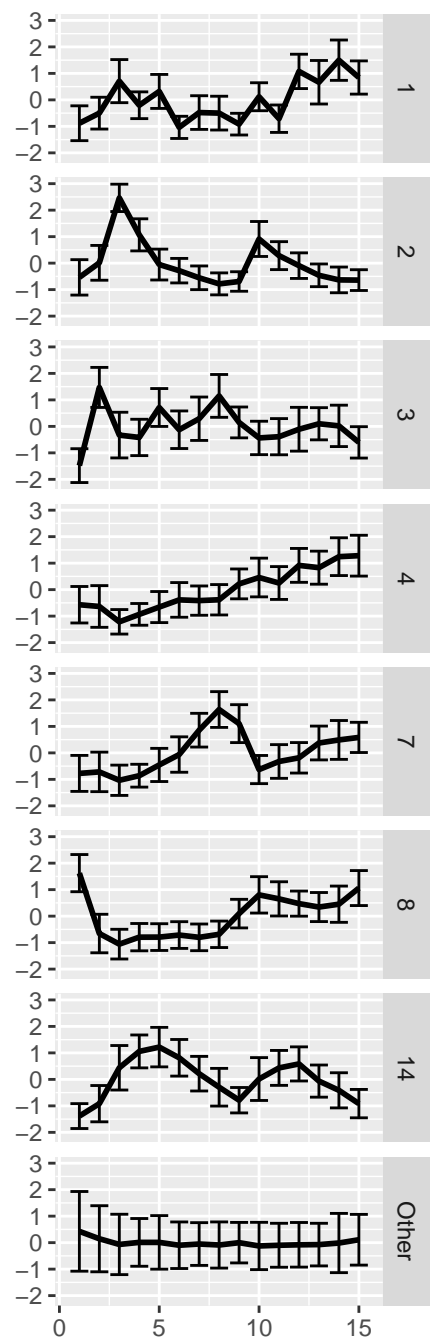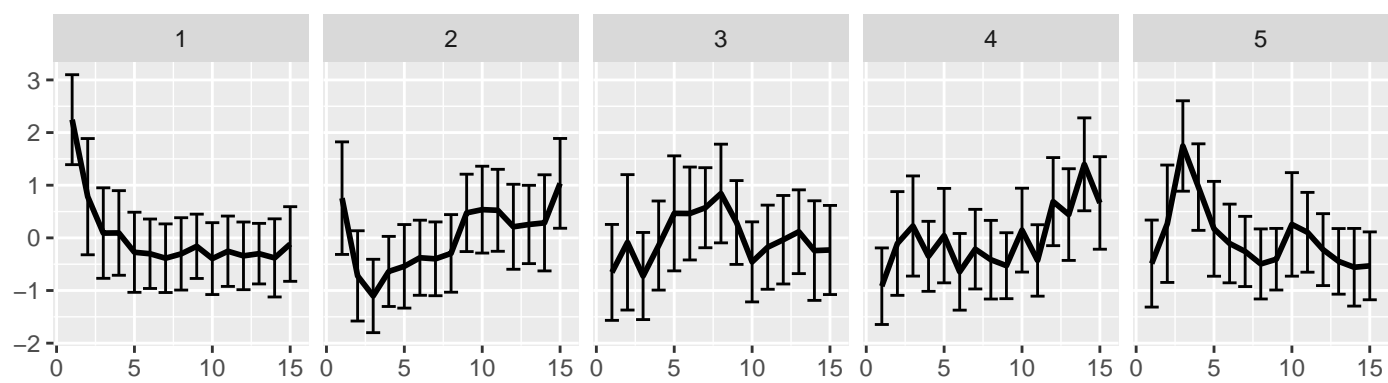

Supplement: Supplementary file 4 [file 30926974]

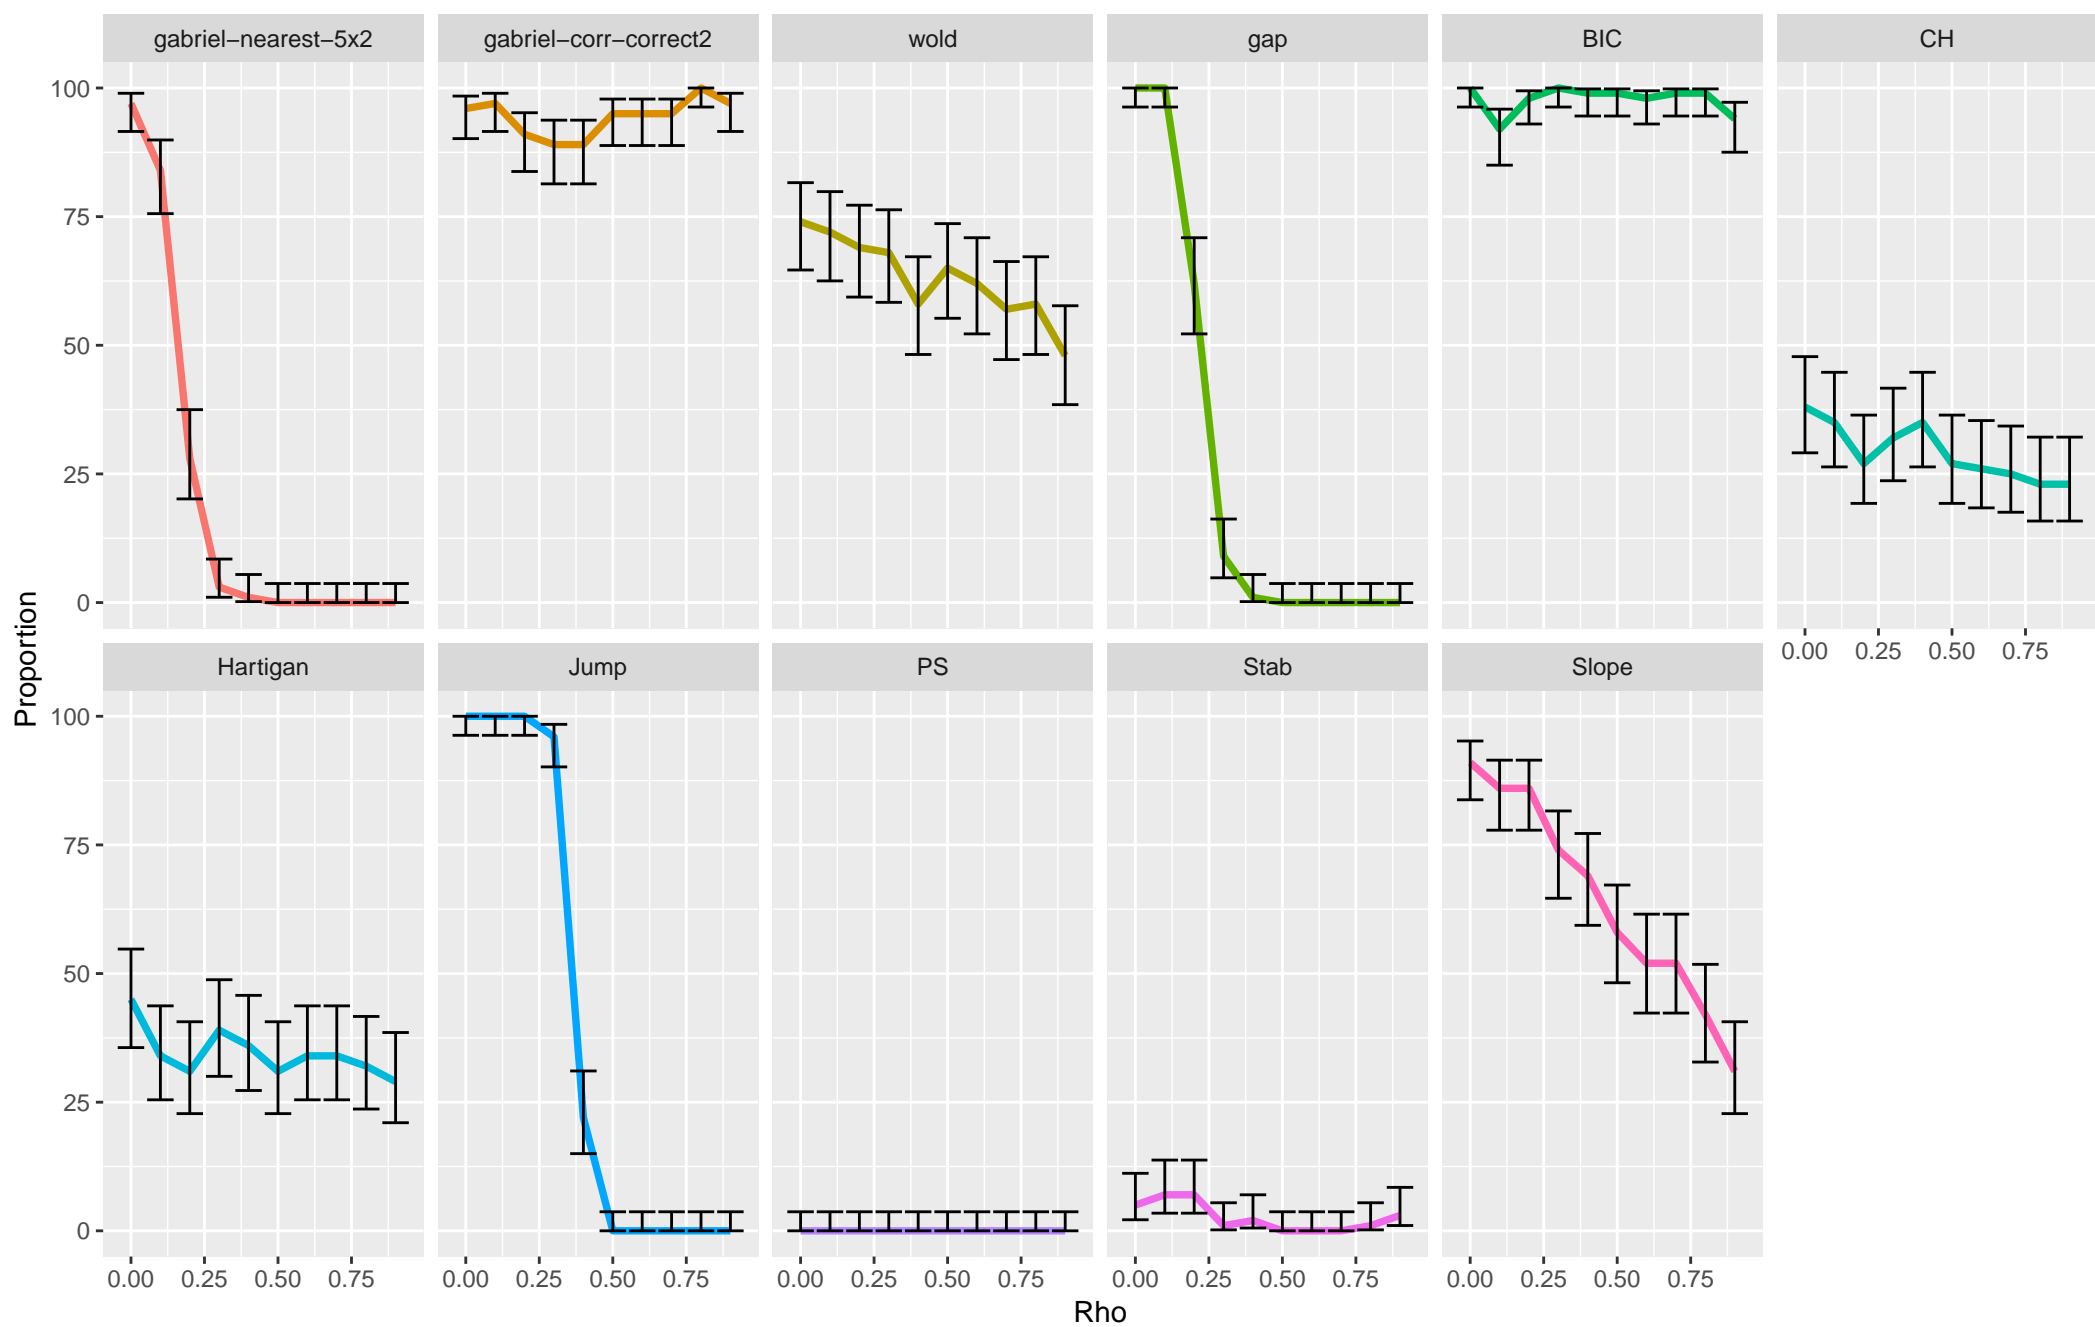

Supplement: Supplementary file 5 [file 30926974]

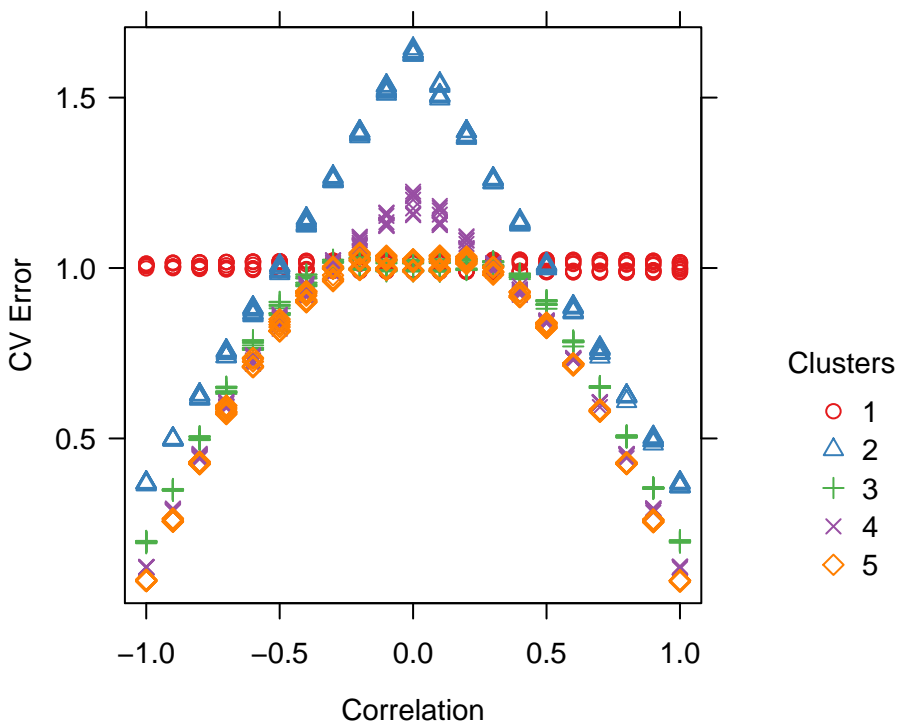

Supplement: Supplementary file 7 [file 30926974]

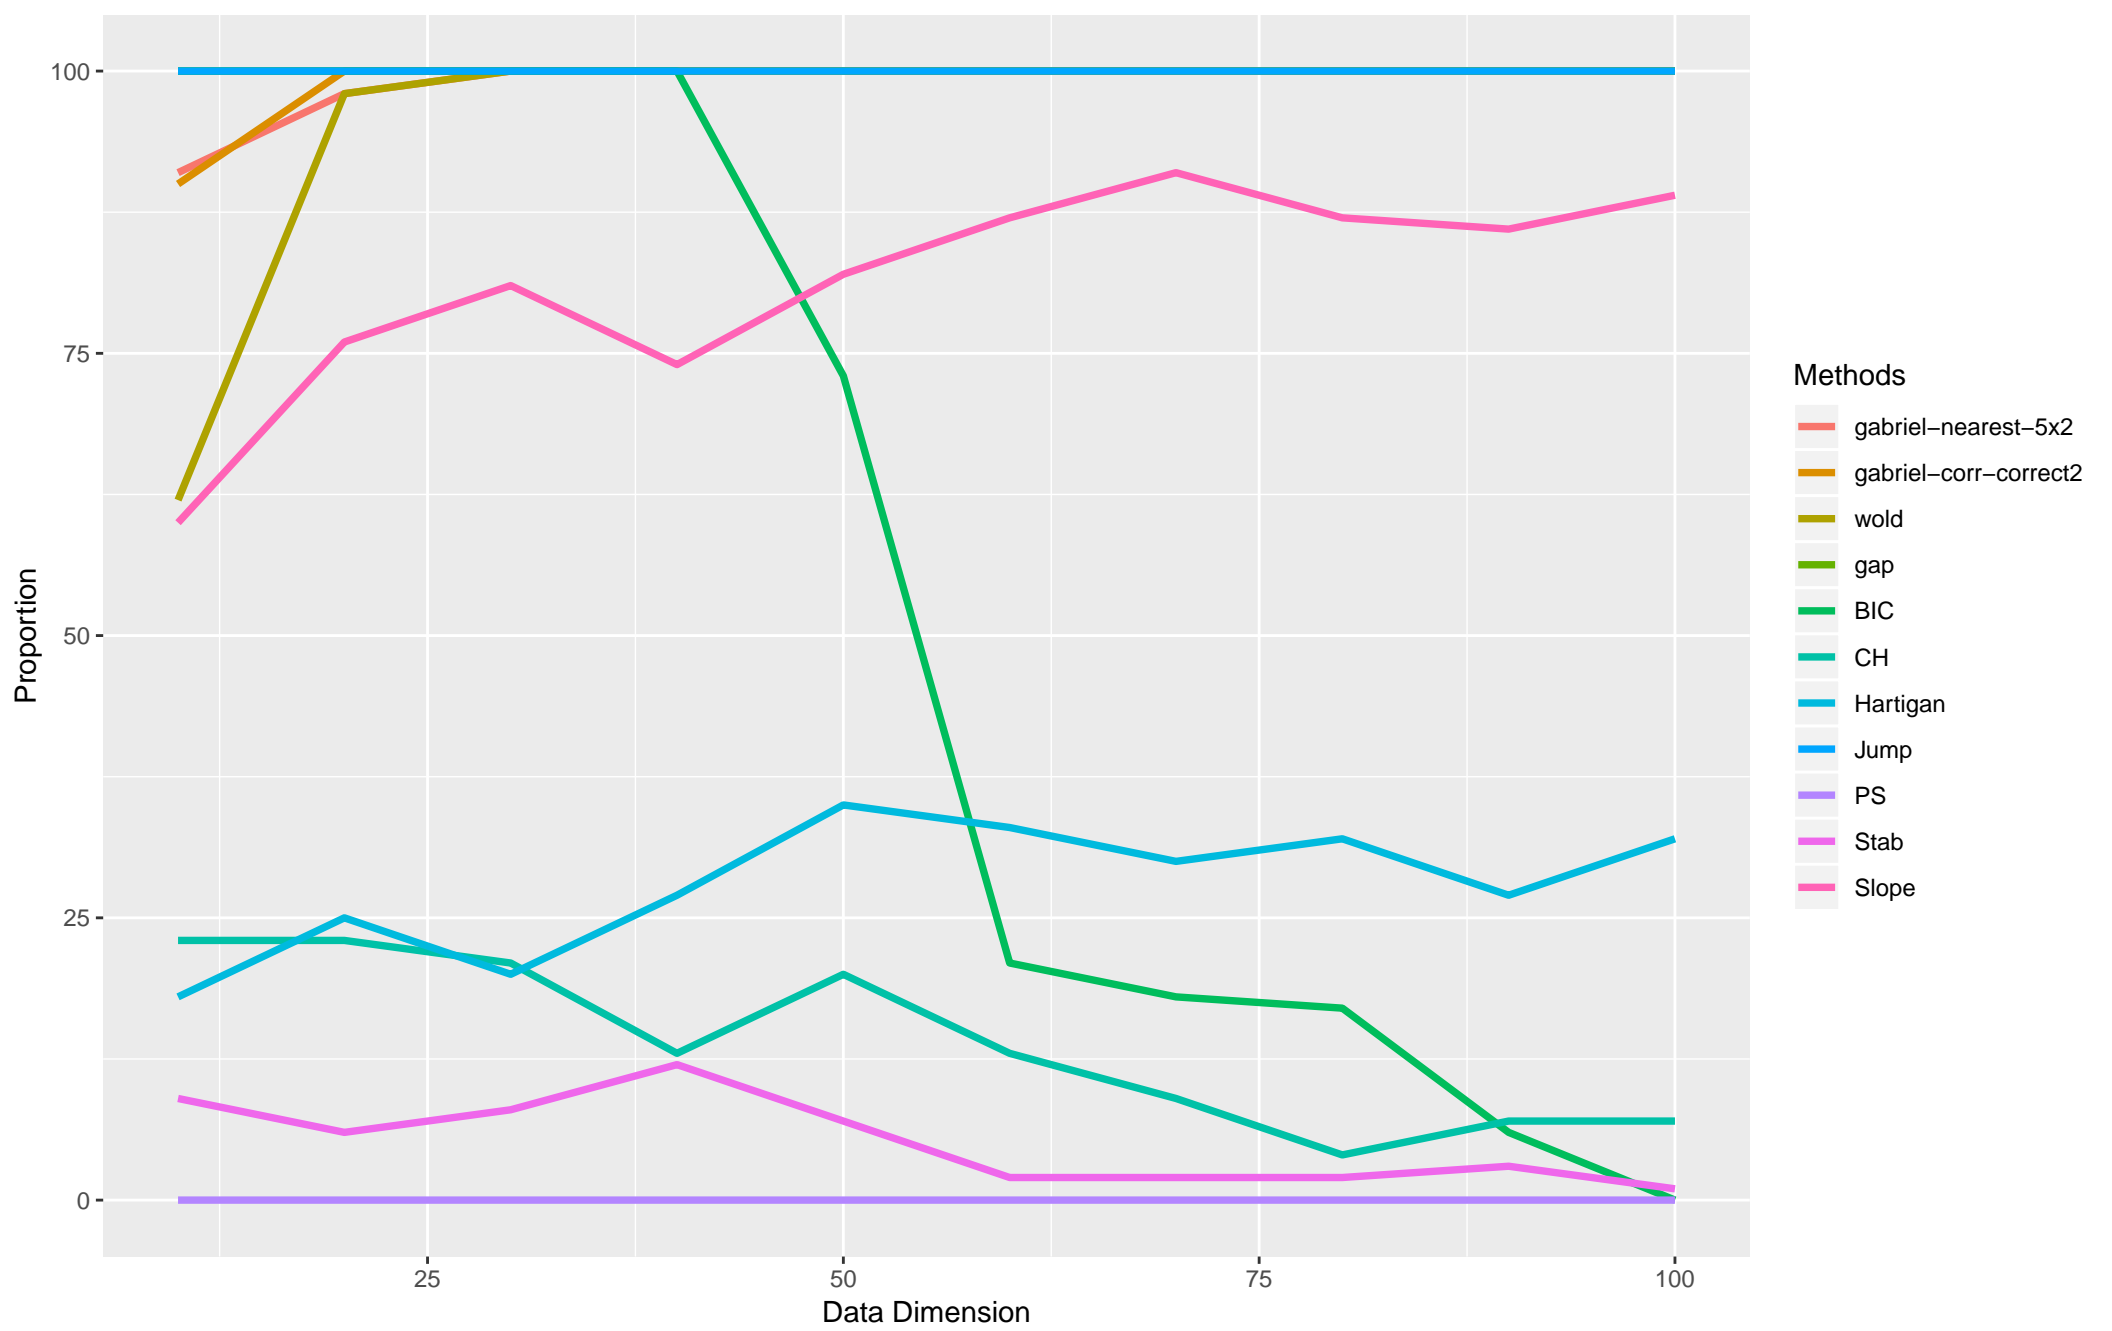

Supplement: Supplementary file 9 [file 30926974]

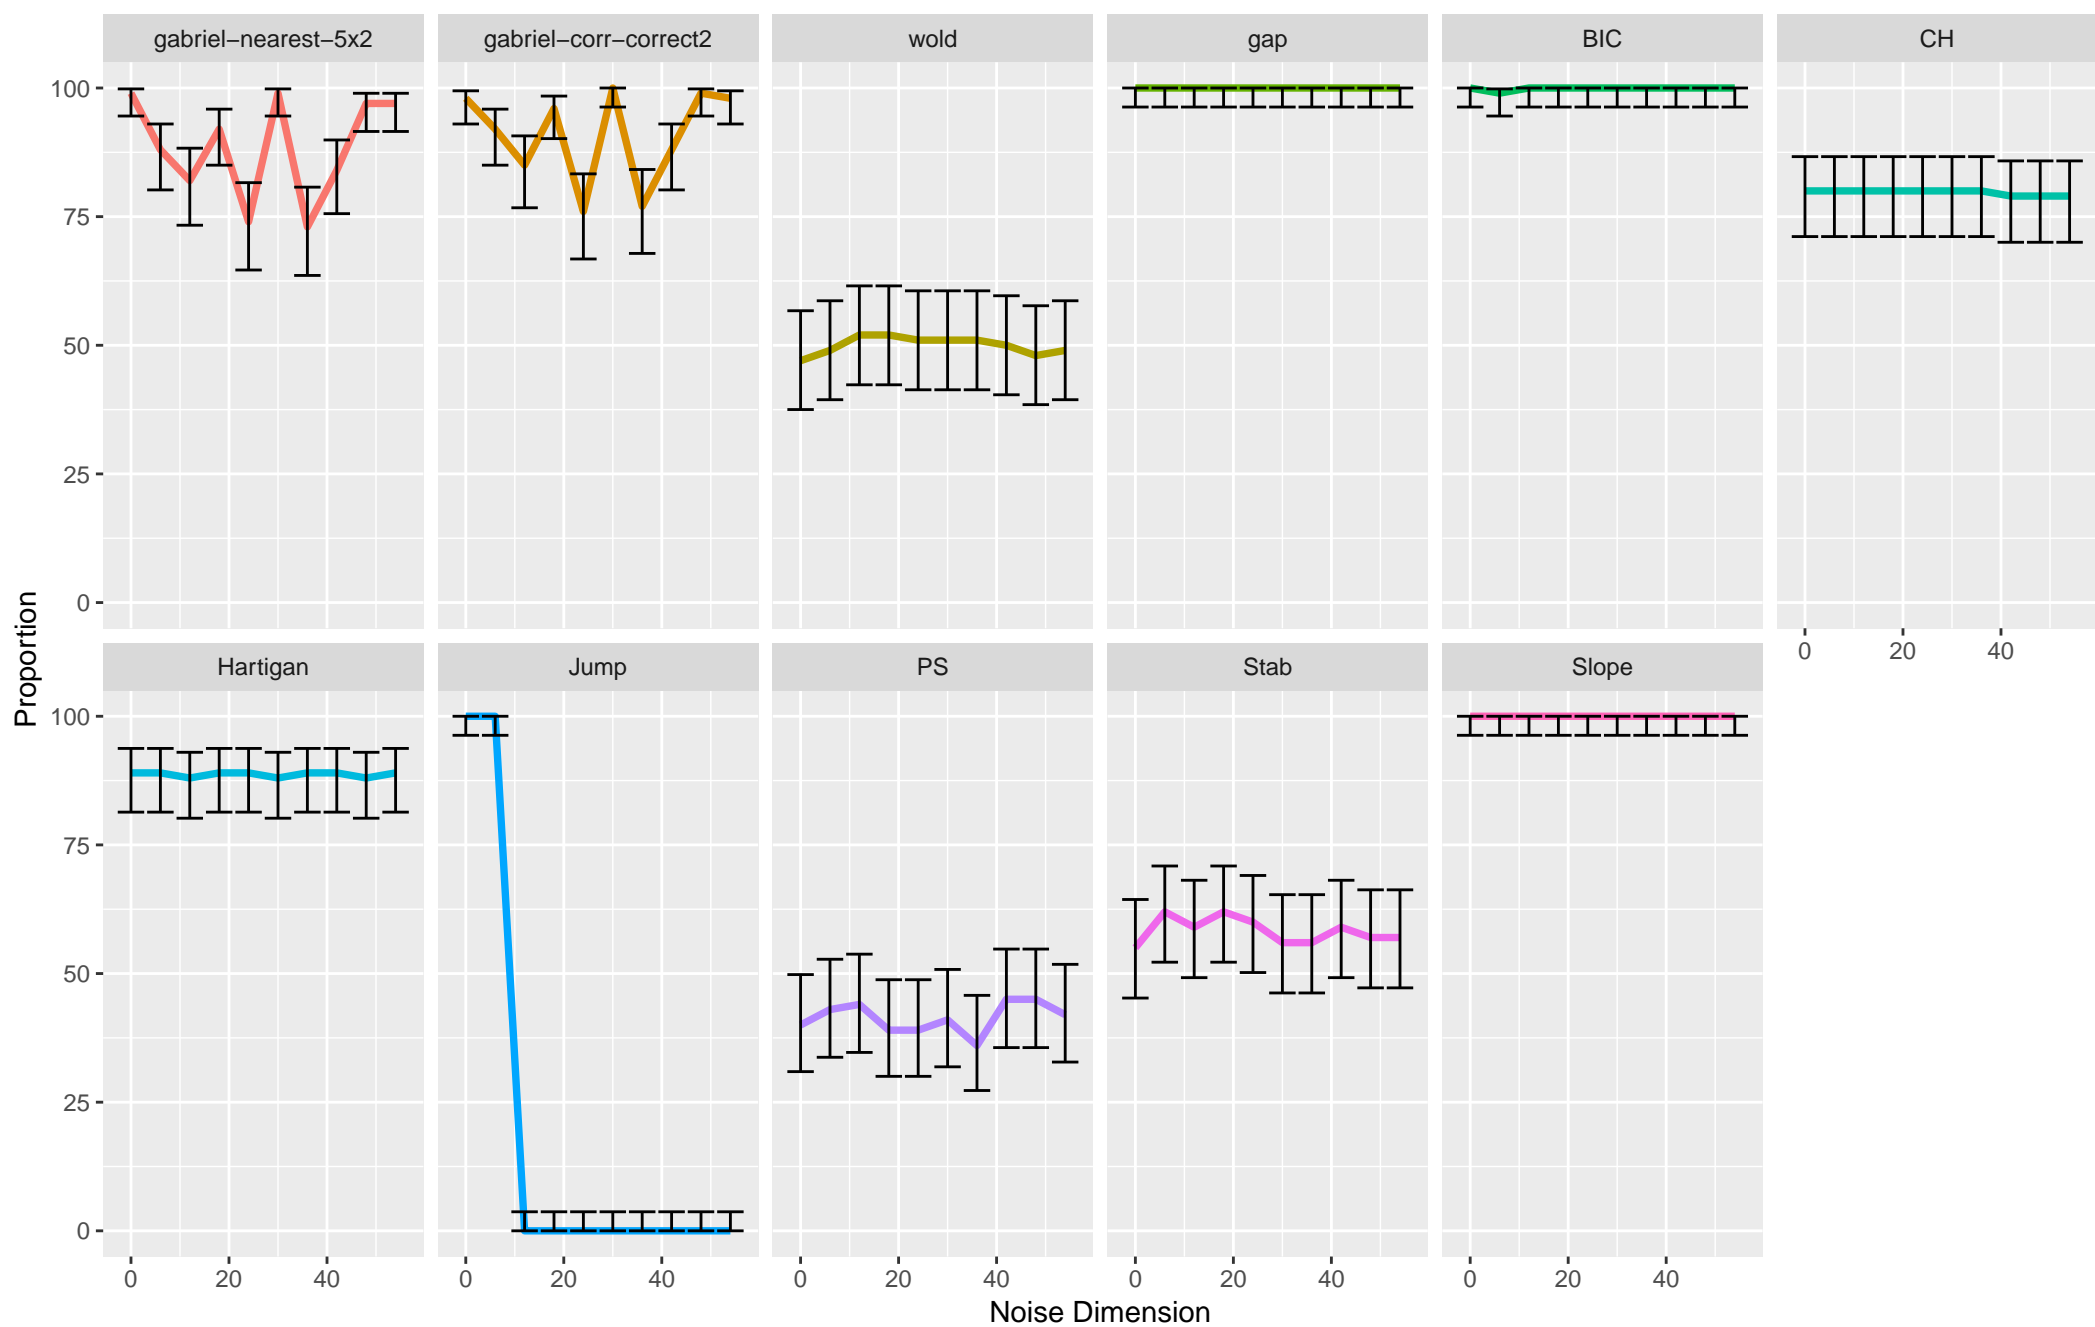

Supplement: Supplementary file 10 [file 30926974]

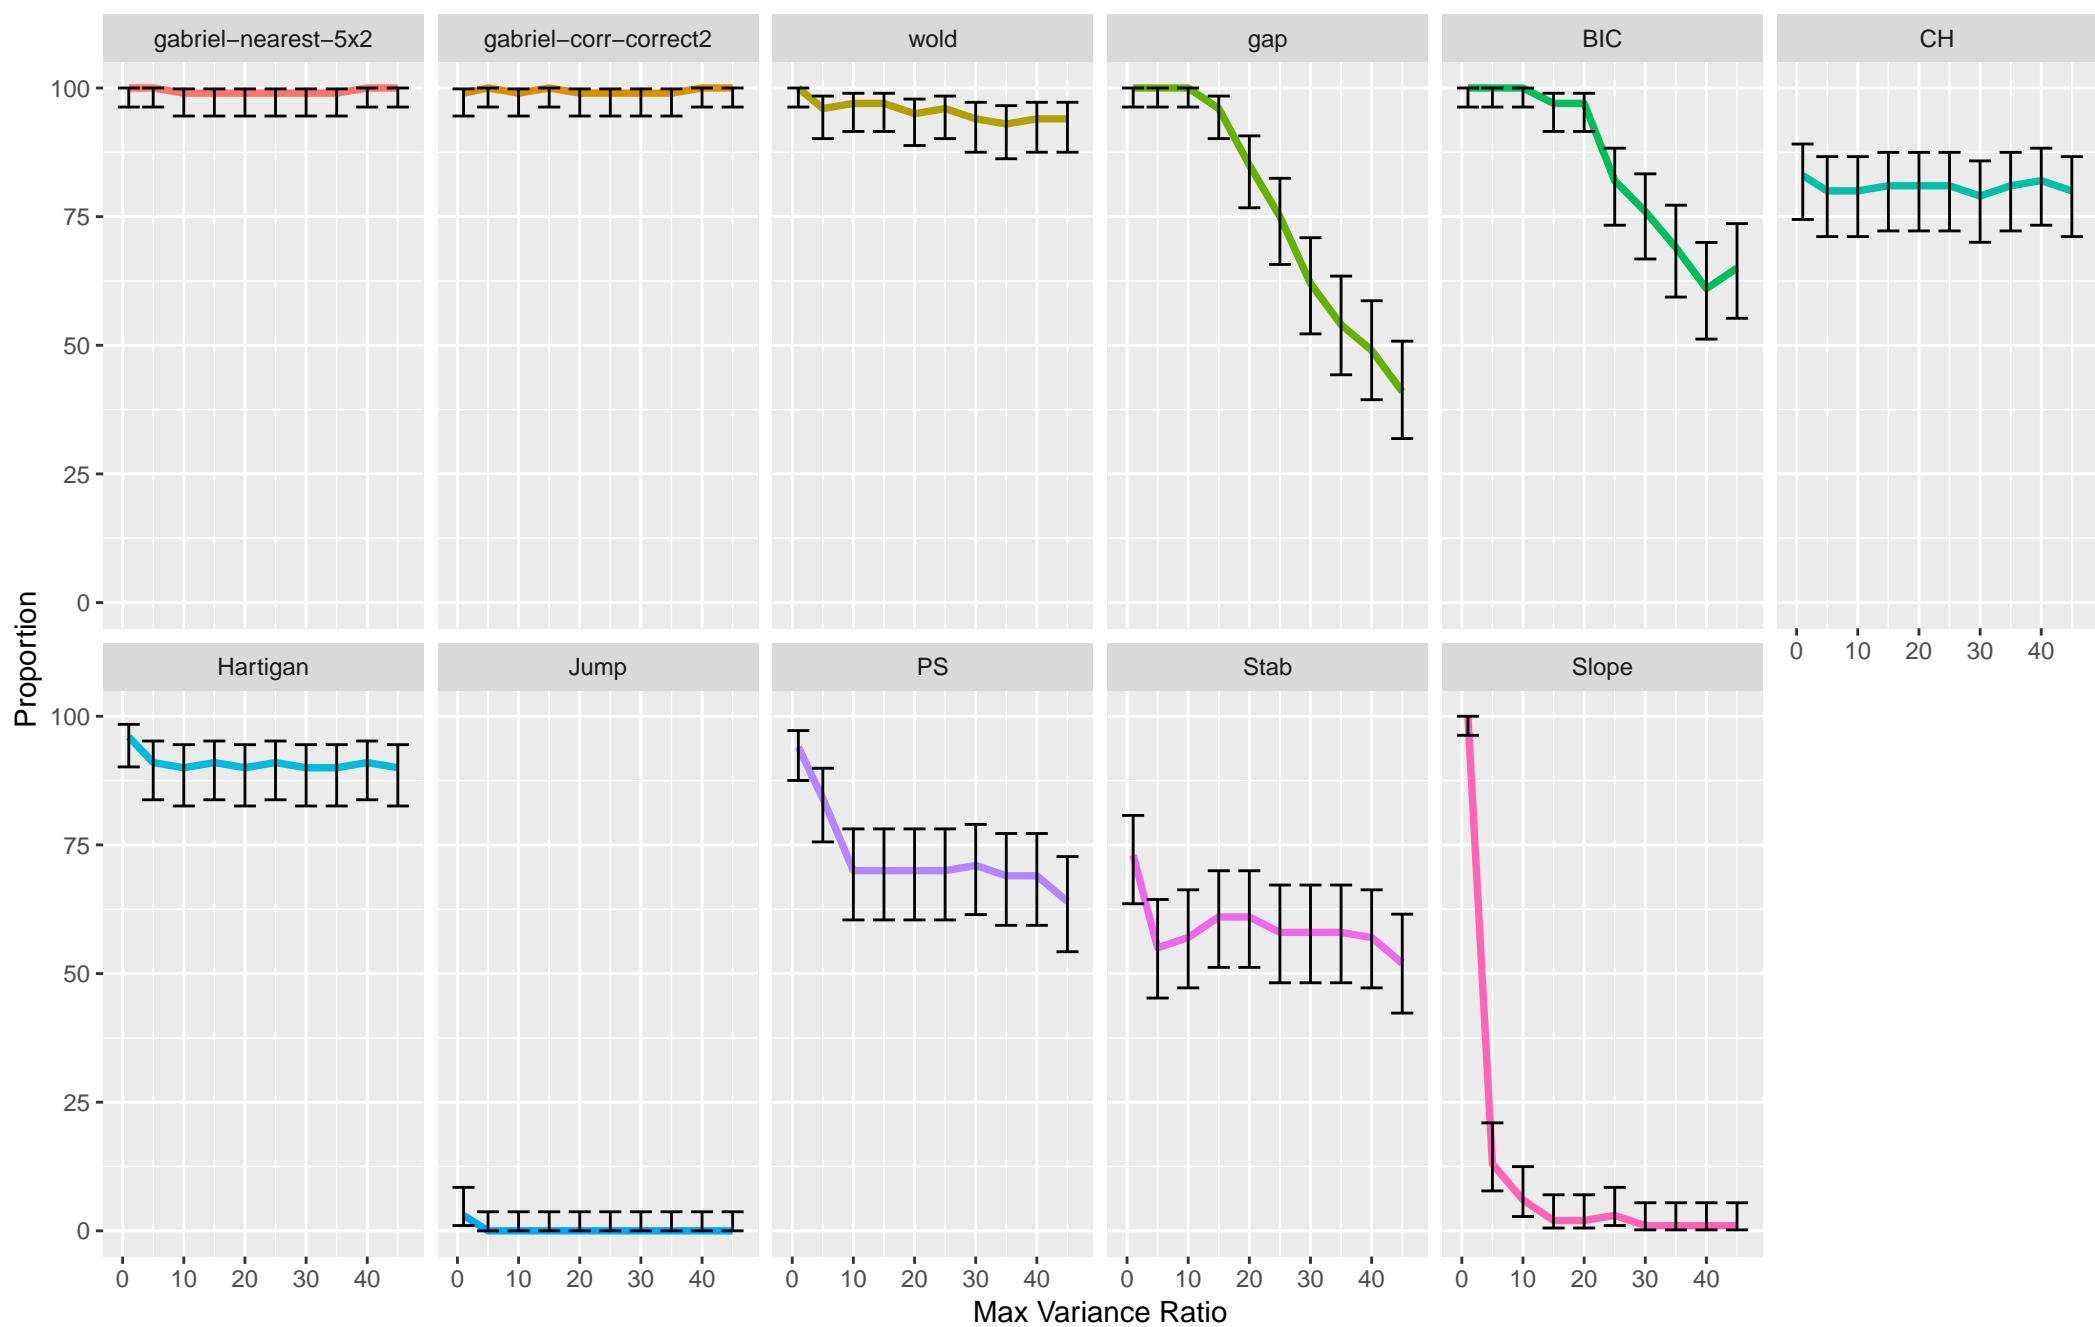

Supplement: Supplementary file 11 [file 30926974]

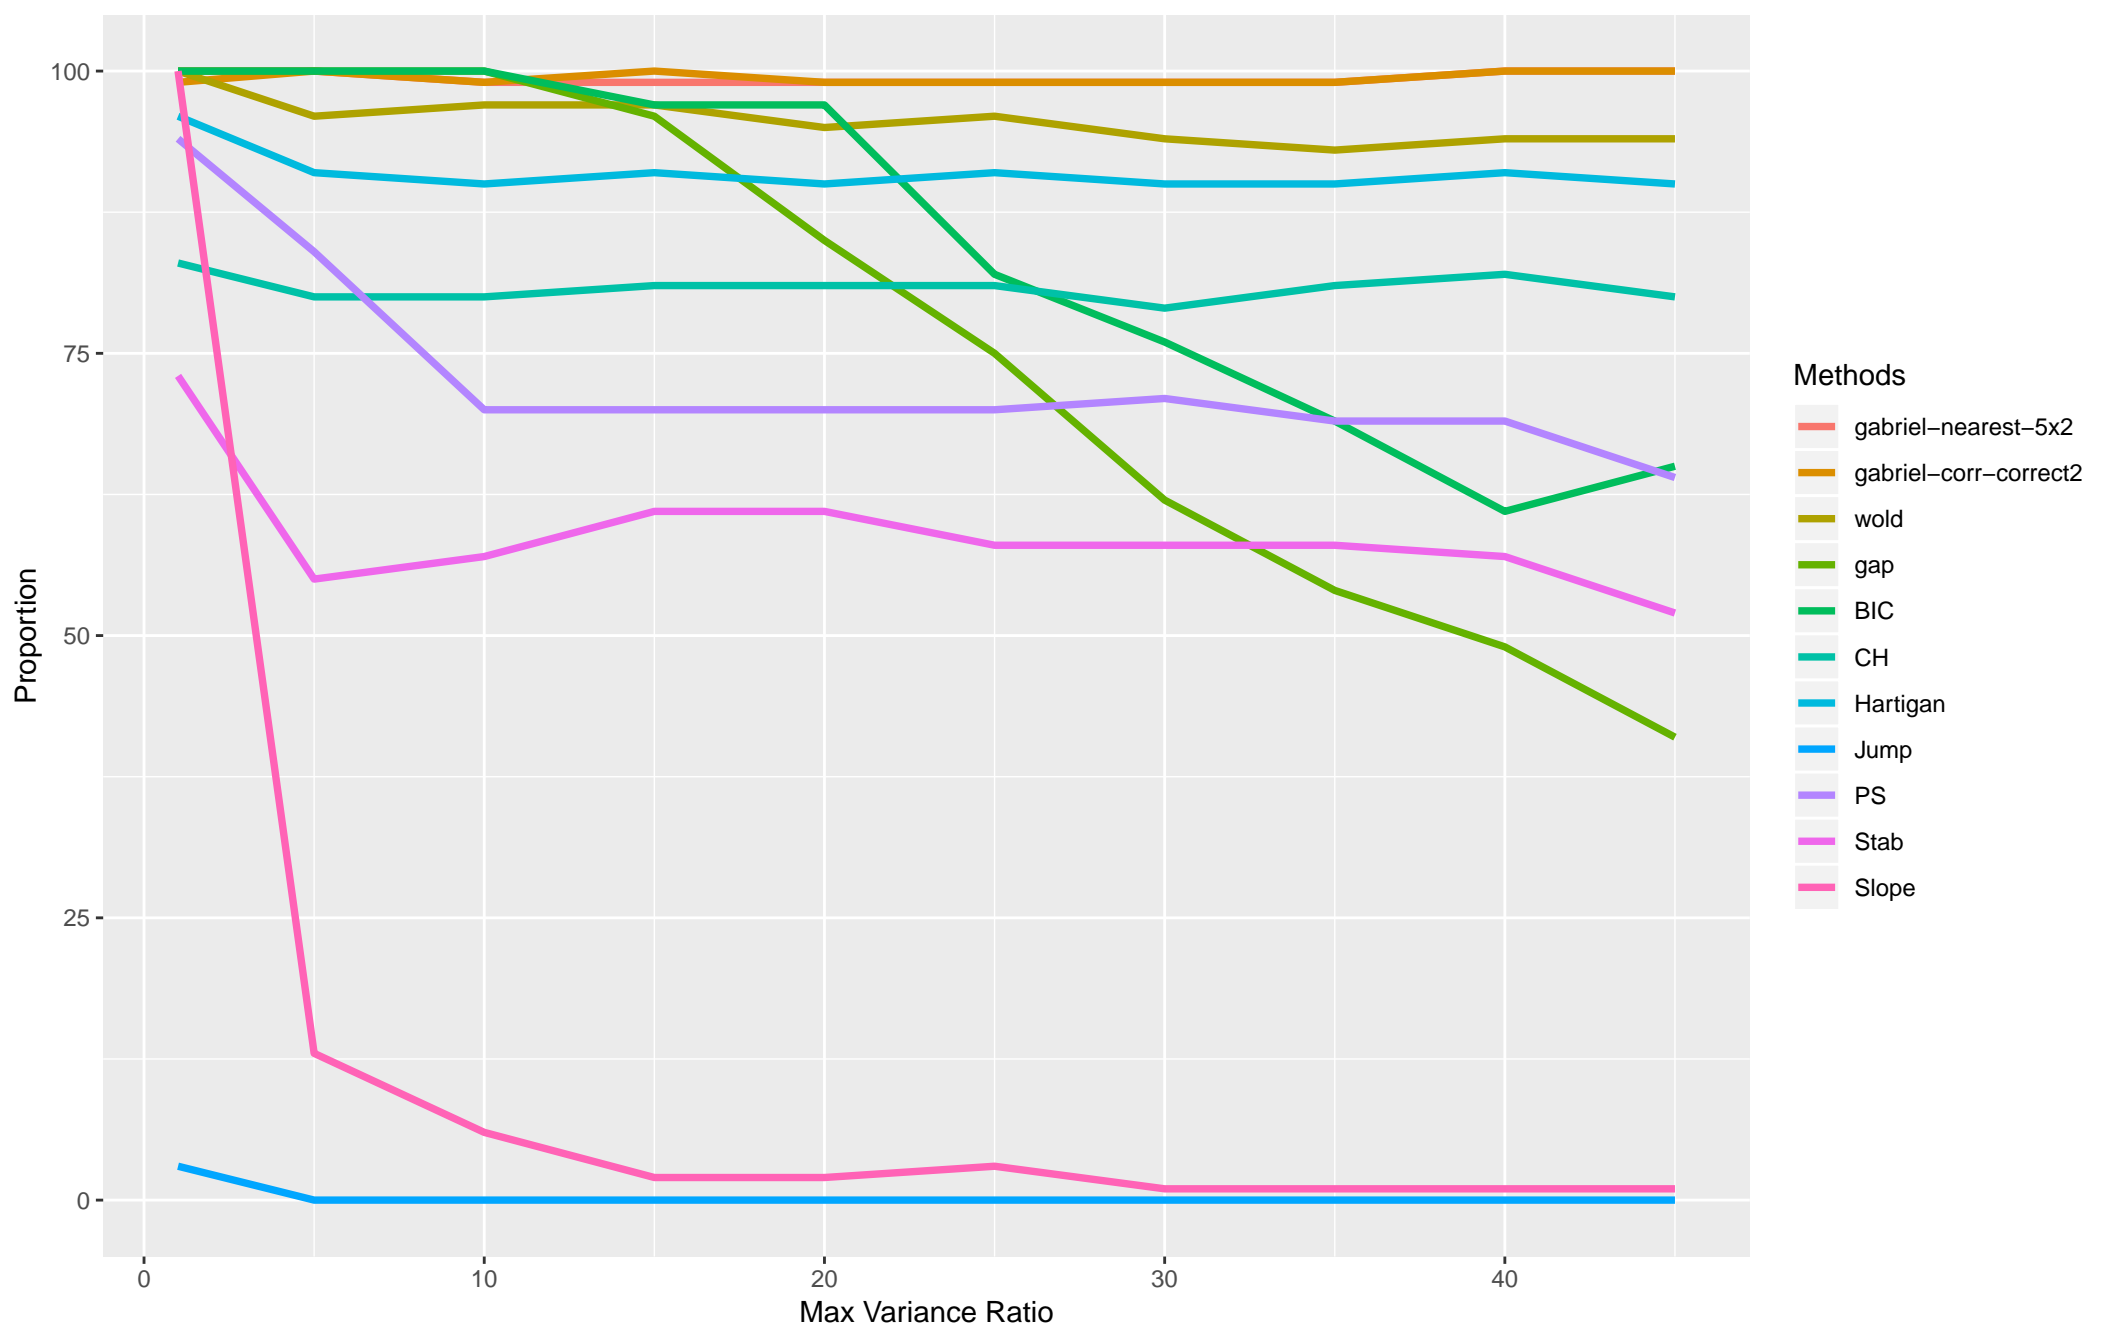

Supplement: Supplementary file 12 [file 30926974]

Y

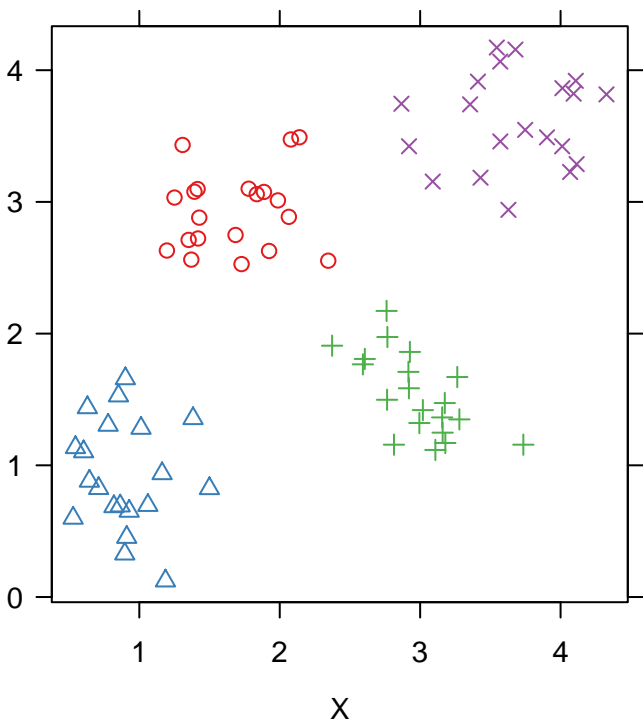

X

Supplement: Supplementary file 13 [file 30926974]

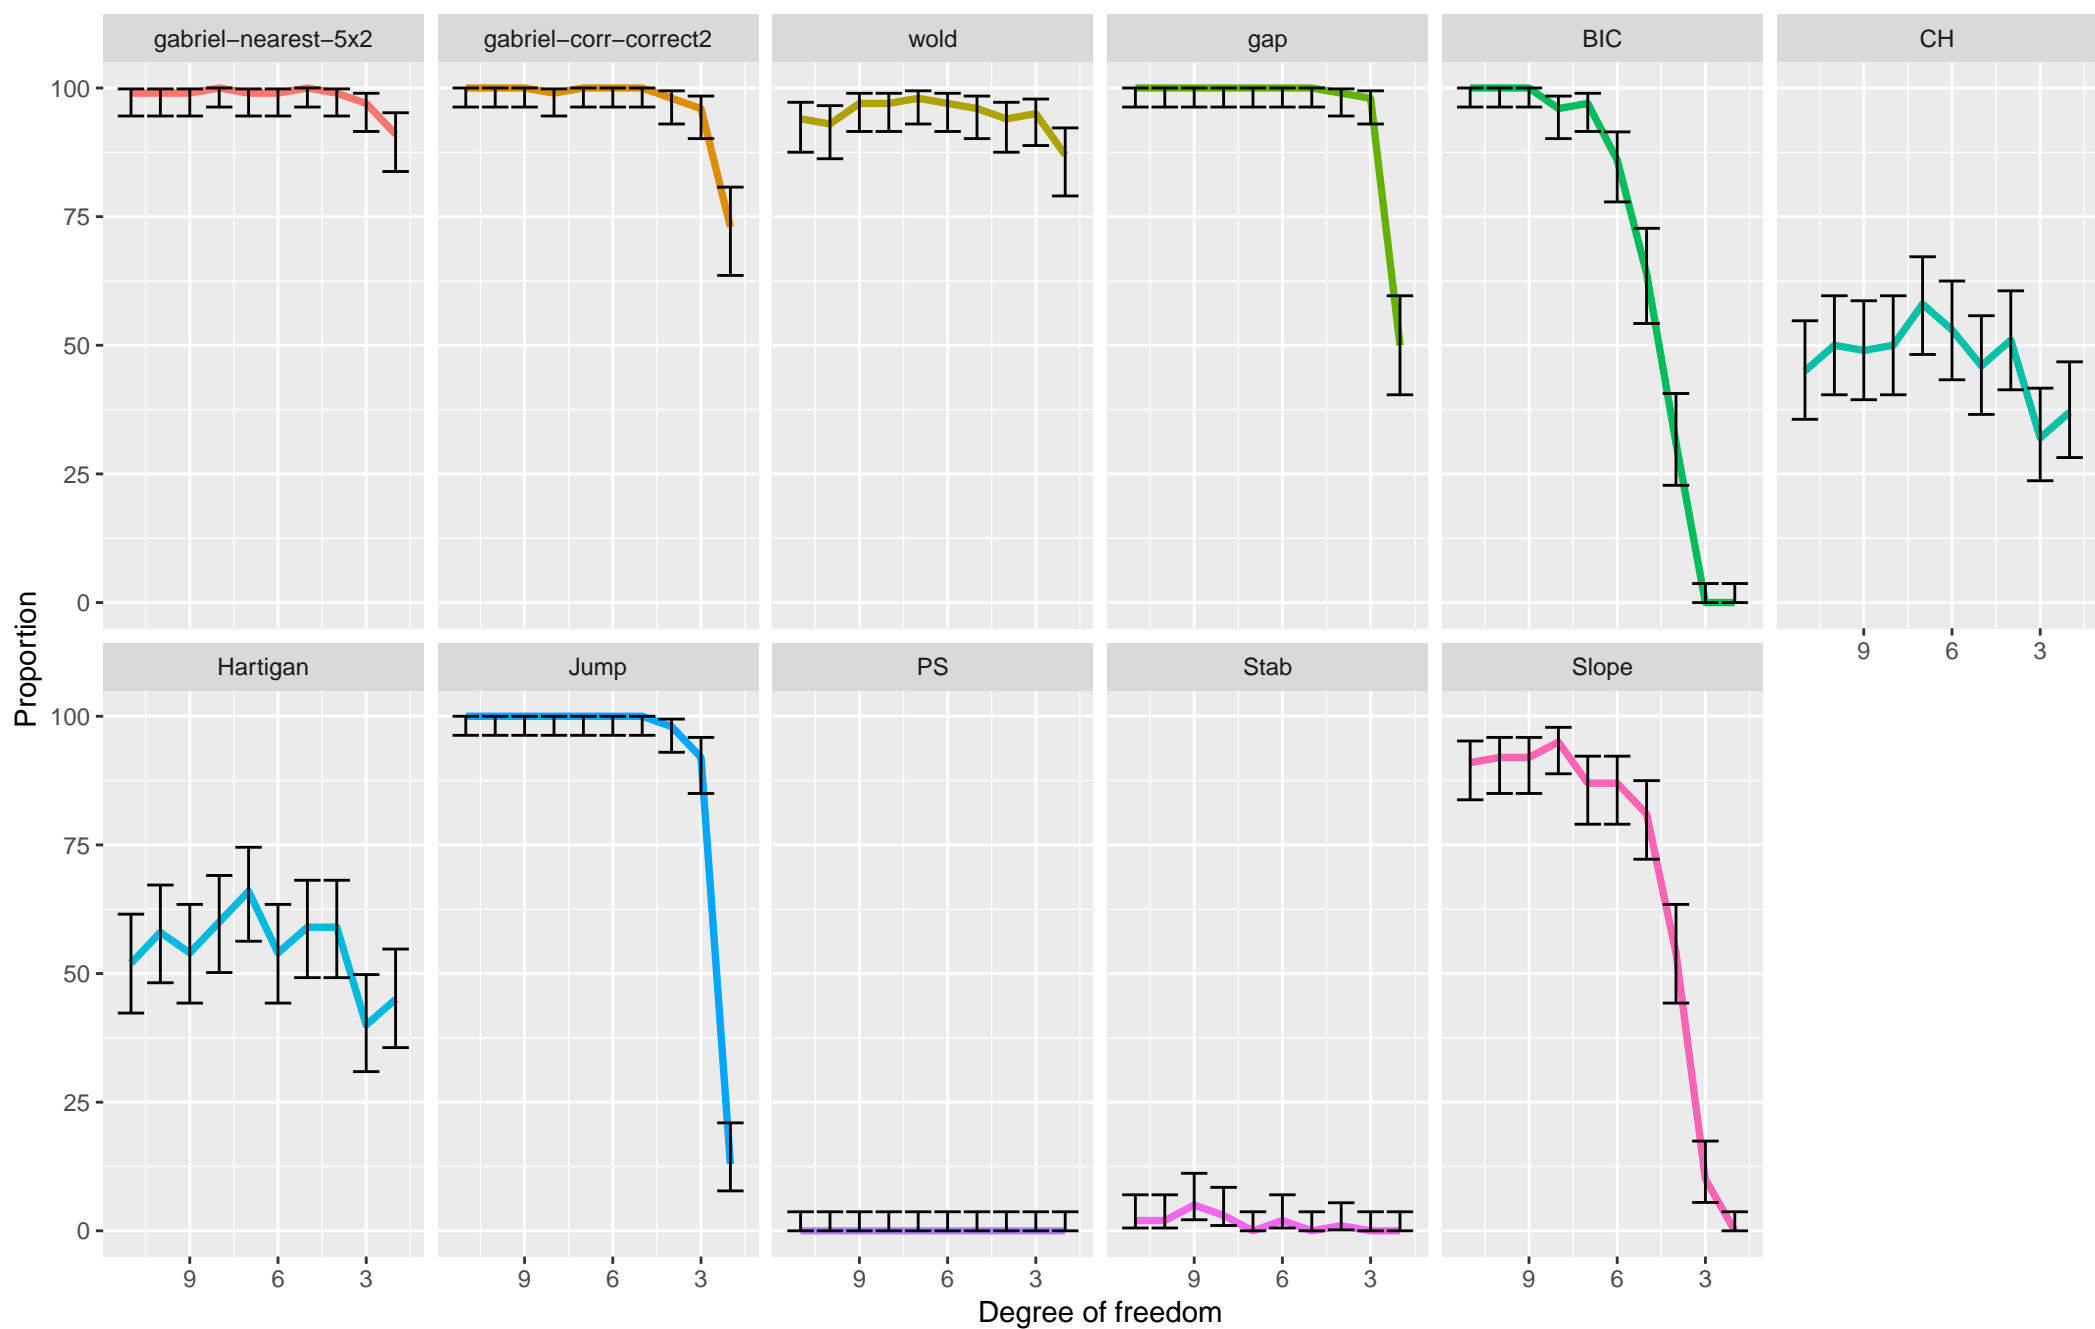

Supplement: Supplementary file 14 [file 30926974]

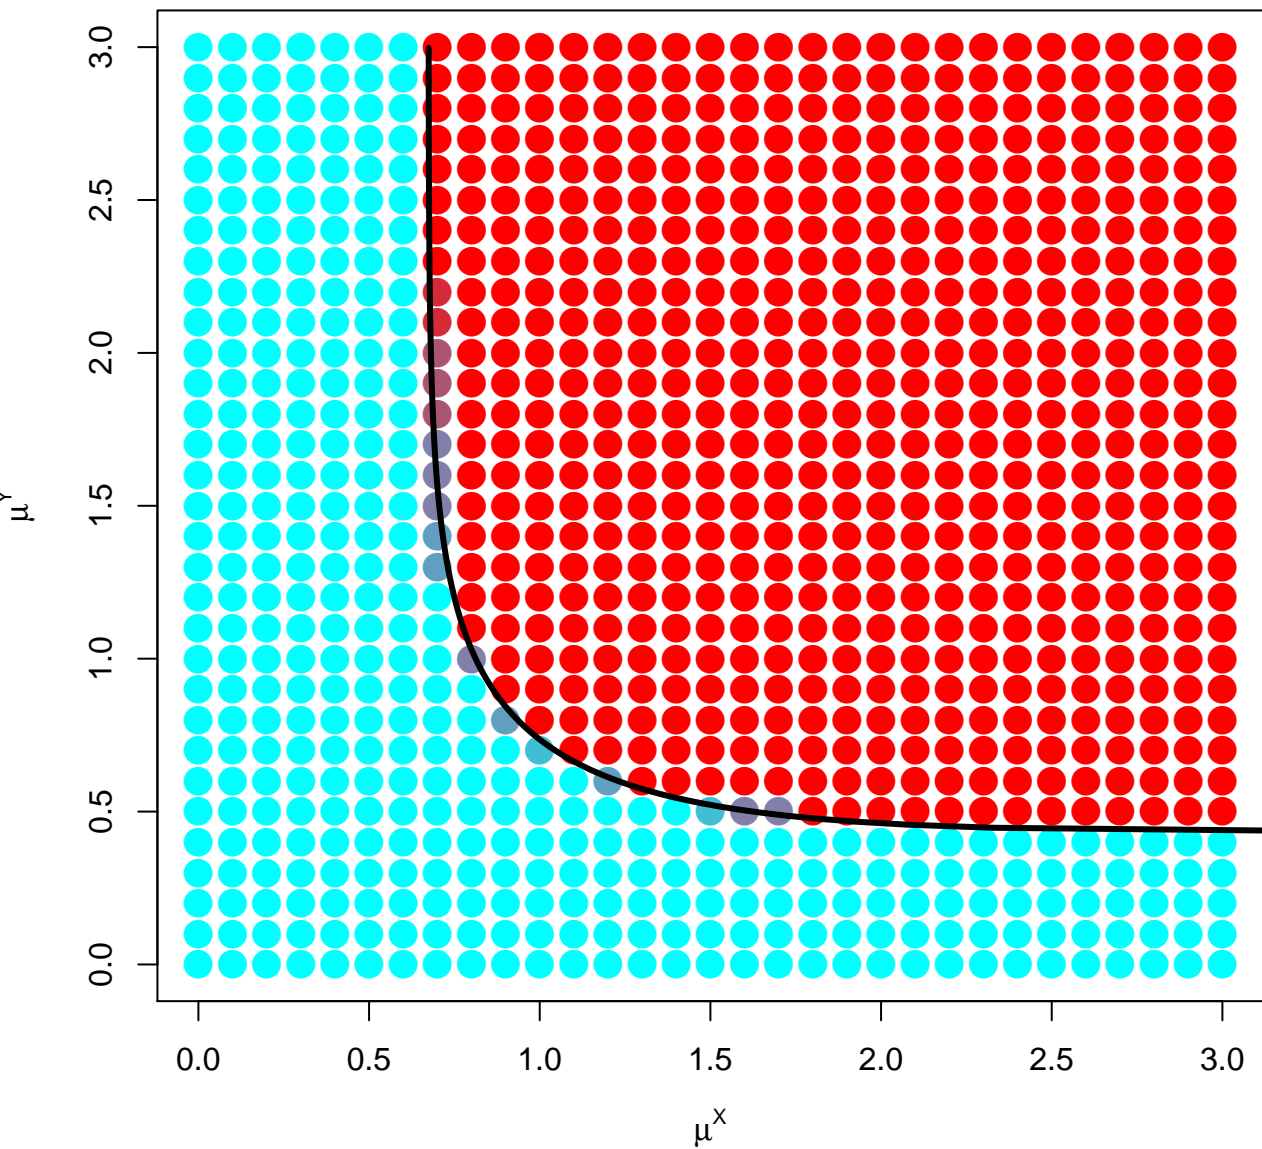

Supplement: Supplementary file 15 [file 30926974]

Y

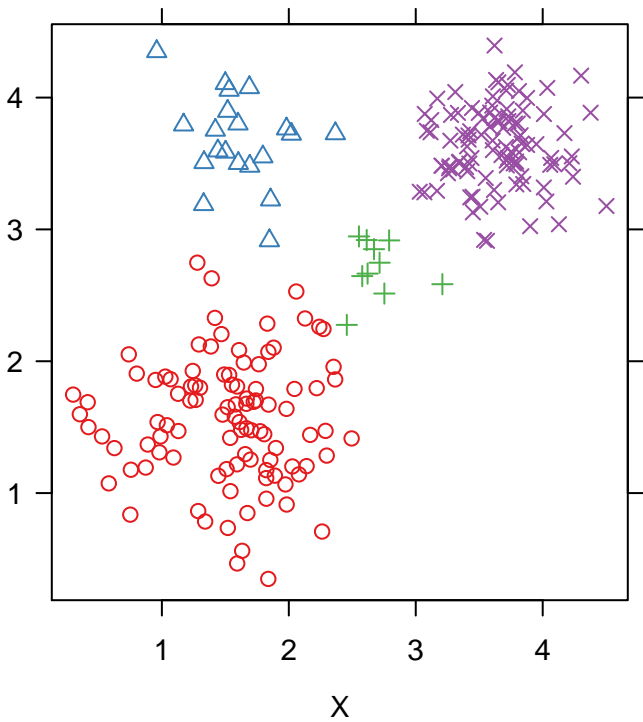

X

Supplement: Supplementary file 16 [file 30926974]

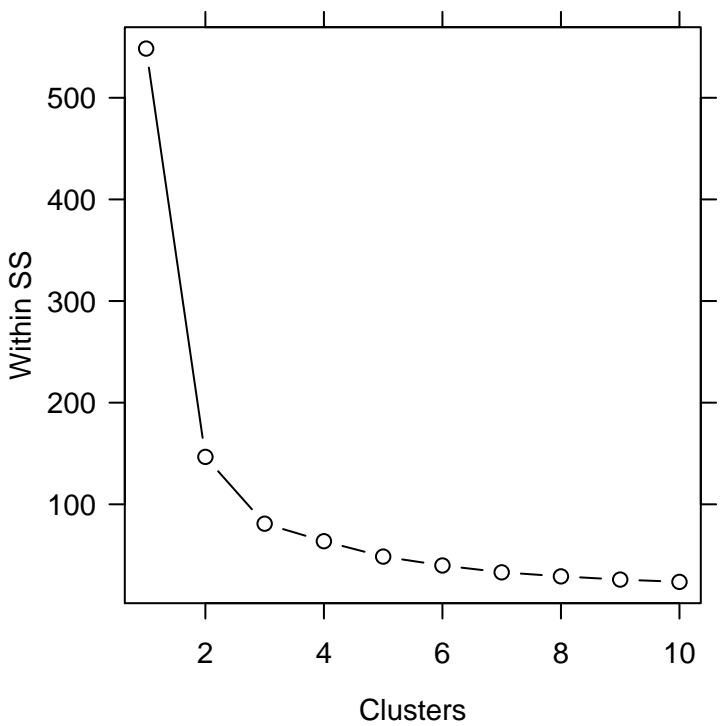

Supplement: Supplementary file 17 [file 30926974]

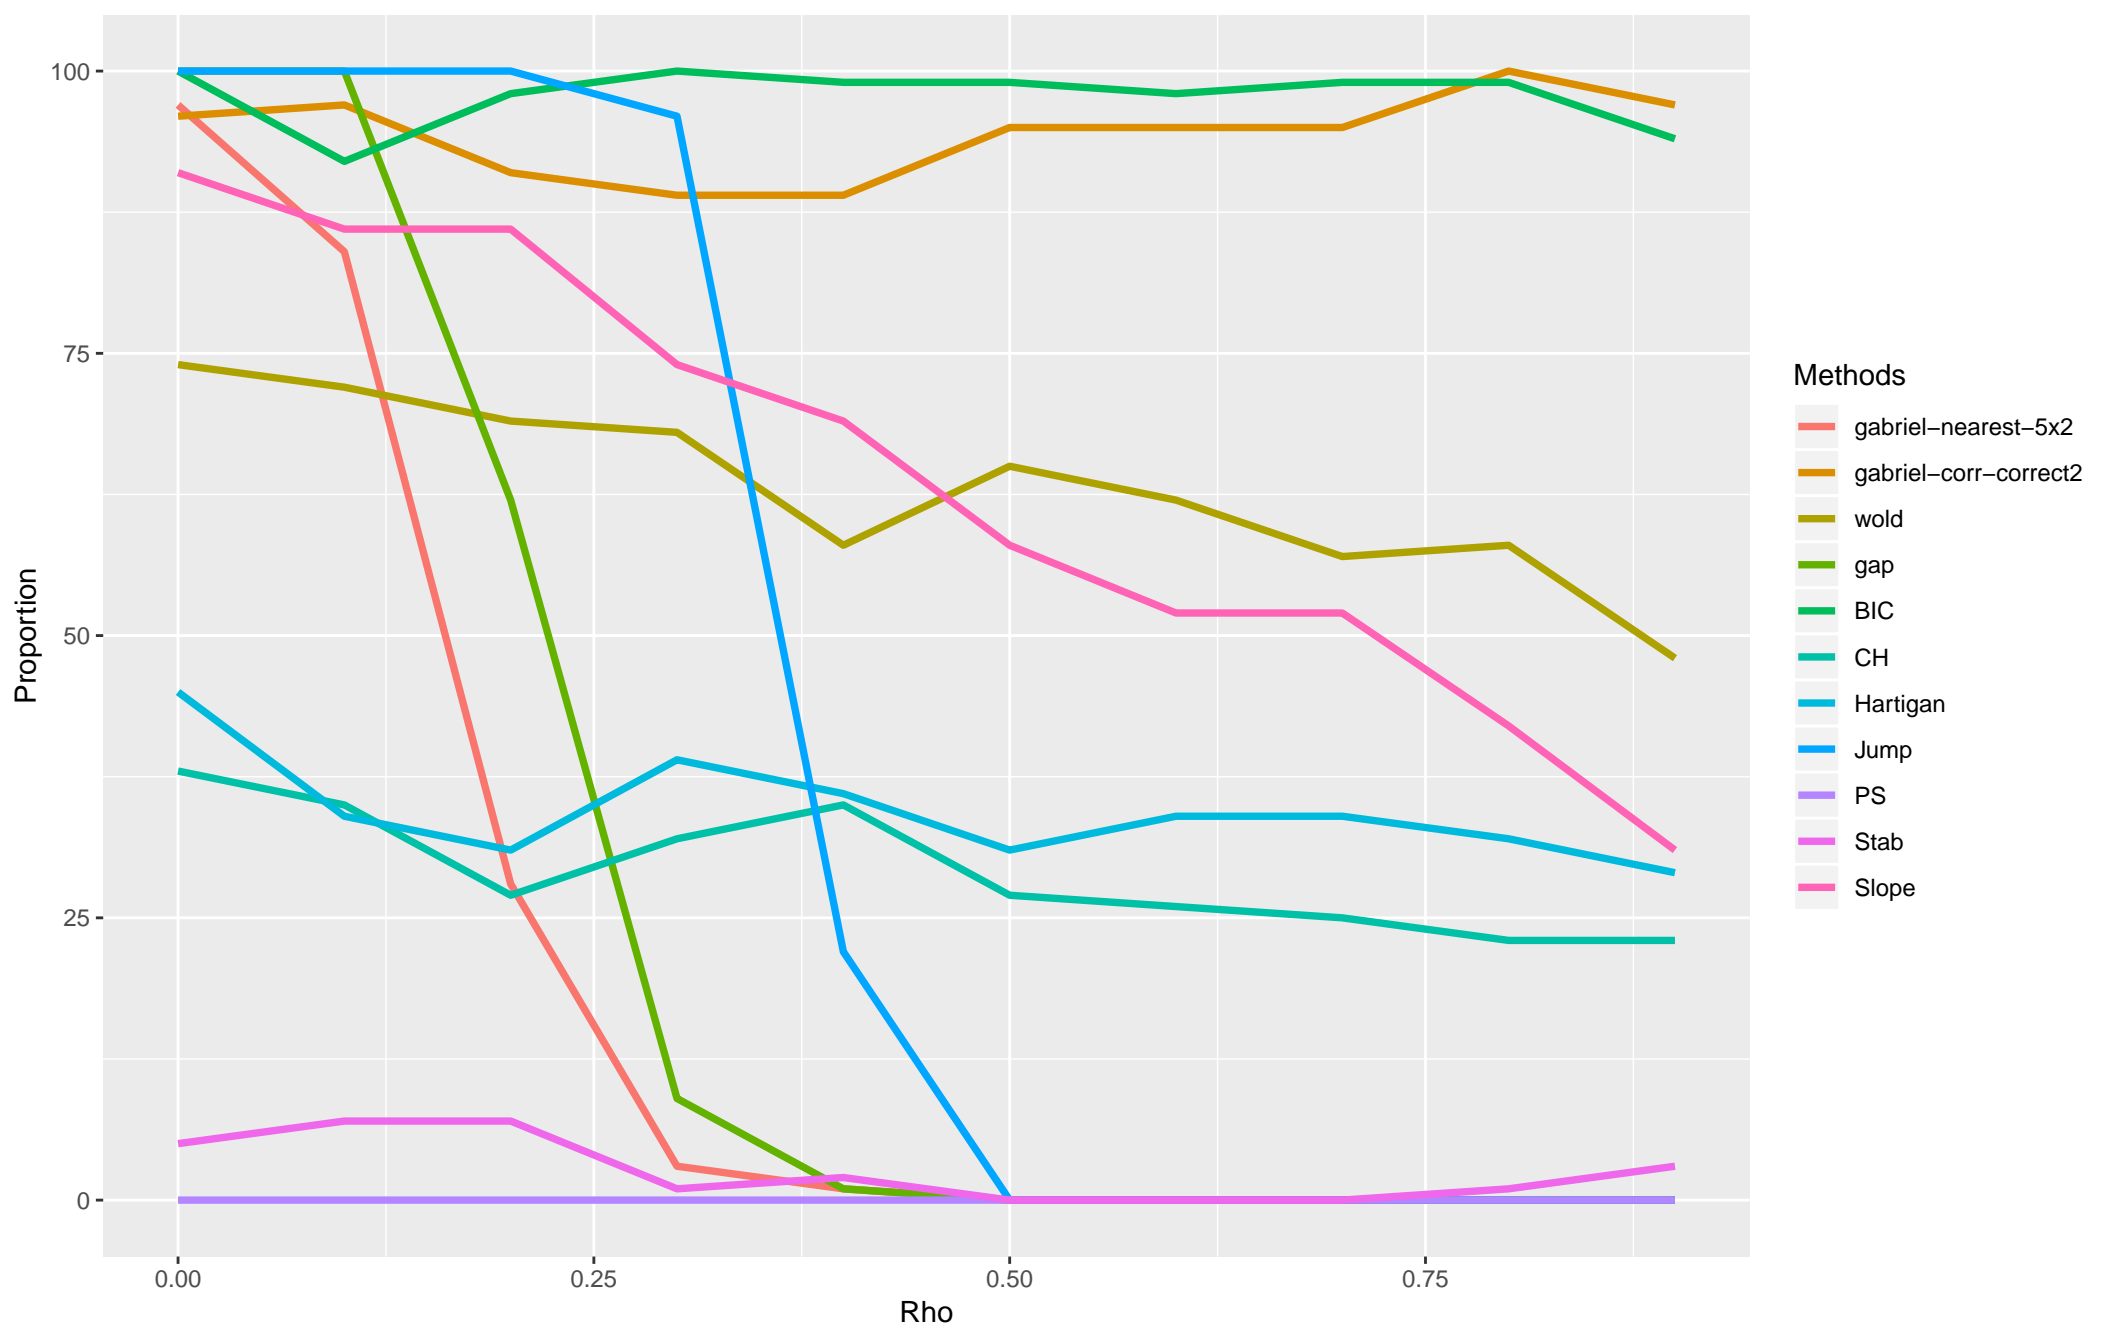

Supplement: Supplementary file 18 [file 30926974]

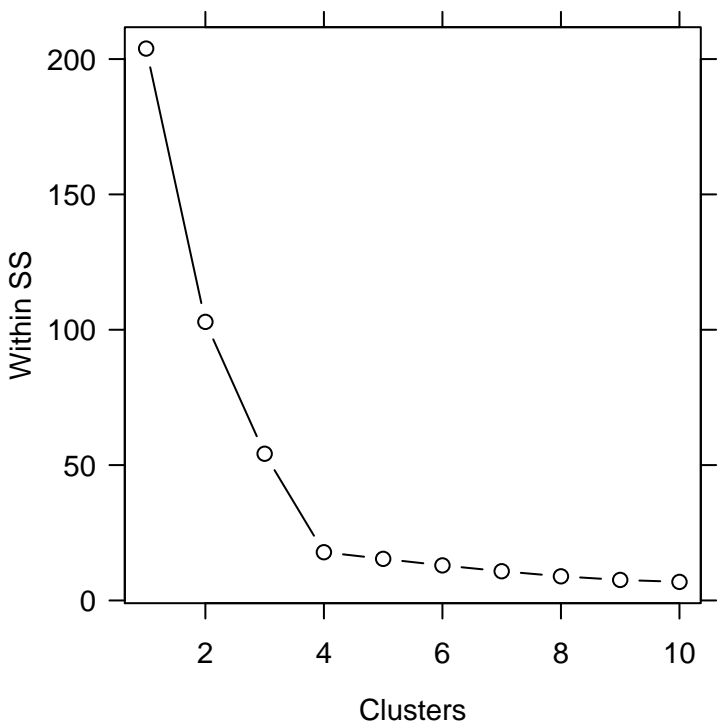

Supplement: Supplementary file 19 [file 30926974]

CV Error

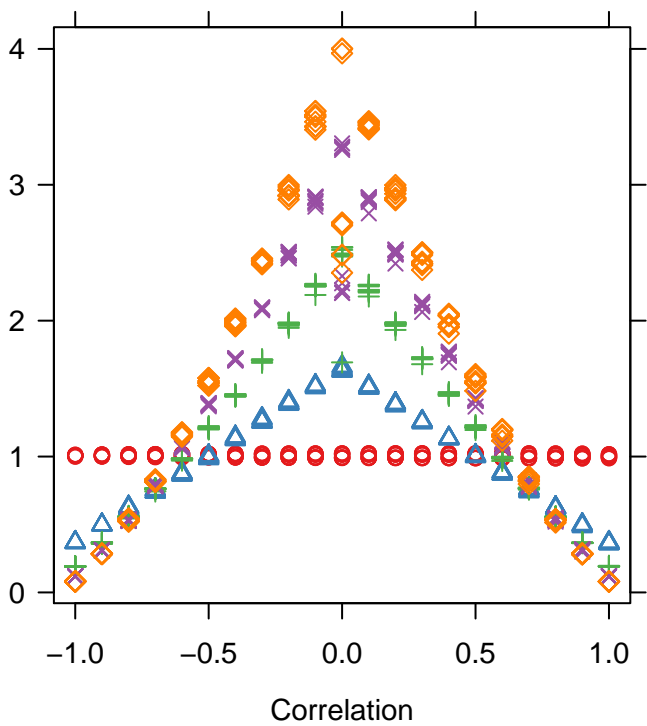

Clusters

- 1
- 2
- 3
- 4
- 5

Supplement: Supplementary file 20 [file 30926974]
